## RESEARCH ARTICLE

# Genome-wide identification and expression analysis of *TPP* gene family under salt stress in peanut (*Arachis hypogaea* L.)

Yanfeng Zhang<sup>1\*</sup>, Minxuan Cao<sup>2</sup>, Qiuzhi Li<sup>3</sup>, Fagang Yu<sup>3\*</sup>

**1** College of Agriculture, Nanjing Agricultural University, Nanjing, Jiangsu, China, **2** College of Agriculture & Biotechnology, Zhejiang University, Hangzhou, Zhejiang, China, **3** Liaocheng Academy of Agricultural Sciences, Liaocheng, Shandong, China

\* [zhangyanfeng1368@163.com](mailto:zhangyanfeng1368@163.com) (YZ); [yufagang2017@163.com](mailto:yufagang2017@163.com) (FY)

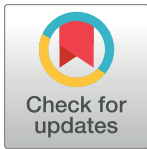

## OPEN ACCESS

**Citation:** Zhang Y, Cao M, Li Q, Yu F (2024) Genome-wide identification and expression analysis of *TPP* gene family under salt stress in peanut (*Arachis hypogaea* L.). PLoS ONE 19(7): e0305730. <https://doi.org/10.1371/journal.pone.0305730>

**Editor:** Pulugurtha Bharadwaja Kirti, Agri Biotech Foundation and Retired Professor, University of Hyderabad, INDIA

**Received:** February 9, 2024

**Accepted:** June 4, 2024

**Published:** July 18, 2024

**Copyright:** © 2024 Zhang et al. This is an open access article distributed under the terms of the [Creative Commons Attribution License](https://creativecommons.org/licenses/by/4.0/), which permits unrestricted use, distribution, and reproduction in any medium, provided the original author and source are credited.

**Data Availability Statement:** All relevant data are within the paper and its [Supporting information files](#).

**Funding:** This work was supported by the Special Fund for Modern Agricultural Industry Technology System in Shandong Province: Shandong Peanut Industry Technology System in Liaocheng Comprehensive Experimental Station (grant number: SDAIT-04-15) and the Key Research and Development Program of Shandong Province

## Abstract

Trehalose-6-phosphate phosphatase (TPP), a key enzyme for trehalose biosynthesis in plants, plays a pivotal role in the growth and development of higher plants, as well as their adaptations to various abiotic stresses. Employing bioinformatics techniques, 45 *TPP* genes distributed across 17 chromosomes were identified with conserved Trehalose-PPase domains in the peanut genome, aiming to screen those involved in salt tolerance. Collinearity analysis showed that 22 *TPP* genes from peanut formed homologous gene pairs with 9 *TPP* genes from *Arabidopsis* and 31 *TPP* genes from soybean, respectively. Analysis of cis-acting elements in the promoters revealed the presence of multiple hormone- and abiotic stress-responsive elements in the promoter regions of *AhTPPs*. Expression pattern analysis showed that members of the *TPP* gene family in peanut responded significantly to various abiotic stresses, including low temperature, drought, and nitrogen deficiency, and exhibited certain tissue specificity. Salt stress significantly upregulated *AhTPPs*, with a higher number of responsive genes observed at the seedling stage compared to the podding stage. The intuitive physiological effect was reflected in the significantly higher accumulation of trehalose content in the leaves of plants under salt stress compared to the control. These findings indicate that the *TPP* gene family plays a crucial role in peanut's response to abiotic stresses, laying the foundation for further functional studies and utilization of these genes.

## Introduction

Peanut (*Arachis hypogaea* L.) is a global oilseed and economic crop. Not only does it serve as a crucial source of high-quality vegetable oils and proteins, it also serves as a primary raw material for the production of high-quality food products. The peanut industry holds significant development potential [1, 2]. Salt stress is a critical factor that restricts plant growth and development, and soil salinization represents a serious environmental challenge for global irrigated agriculture. It is also the main driver of land degradation, leading to soil compaction, fertility loss, and exacerbated soil erosion. The reasons for soil salinization include improper irrigation,

(Agricultural Variety Project): Breakthrough New Variety Breeding of Peanuts with High Oil, High Oleic Acid, Stress Resistance, and High Yield (grant number: 2020LZGC001).

**Competing interests:** The authors have declared that no competing interests exist.

vegetation damage, and seawater intrusion. Currently, the global saline-alkali land area measures approximately 954 million hectares, and spans various continents and subcontinent regions [3]. The total area of saline-alkali land in China also stands at 99.13 million hectares, accounting for about 10% of the country's landmass [3, 4]. Almost all peanut species belong to glycophytes or non-halophytes and display sensitivity to  $\text{Na}^+$ . When the soil salinity exceeds 0.3%, it will affect the growth and development of peanuts, cause growth obstacles, and seriously reduce peanut yield [5]. In production, the threshold for soil salt content to ensure peanut emergence is about 0.45%, and exceeding this concentration may result in the inability to emerge [6].

Trehalose is a non-reducing disaccharide widely present in plants, bacteria, and invertebrates. It not only serves as a carbon storage and transportation mechanism within organisms but also acts as a protective agent that enhances resistance to adverse environments [7, 8]. In plants, trehalose synthesis occurs through a two-step enzymatic process. Initially, the enzyme trehalose-6-phosphate synthase (TPS) catalyzes the conversion of uridine diphosphate glucose and glucose-6-phosphate into trehalose-6-phosphate (T6P). Subsequently, trehalose-6-phosphate phosphatase (TPP) catalyzes the dephosphorylation of T6P, ultimately producing trehalose. It has been established through research that the accumulation of trehalose in organisms is closely related to stress. Under heat shock conditions, the trehalose content in *Saccharomyces cerevisiae* reached 30% of cell dry weight. Under high temperatures, yeast strains that knocked out the *TPS1* gene were difficult to grow, while strains that overexpressed *TPS1* grew well [9, 10]. The increase in trehalose content of *Arabidopsis* enhances its tolerance to salt stress [11]. Furthermore, trehalose-6-phosphate synthase plays a crucial role in regulating carbohydrate metabolism, growth, development, and stress response. Compared with non-transgenic rice, transgenic rice overexpressing the *TPS* gene maintained better growth under high salt, drought, and low-temperature conditions [12]. The aforementioned research indicates that trehalose and its metabolite T6P are involved in biological signal regulation, and they may serve as important metabolic regulators, coordinating multiple metabolic pathways in plants.

In higher plants, *TPP* genes are distributed on different chromosomes in the form of a gene family, mainly characterized by the presence of a conserved Trehalose-PPase domain [13–15]. With the rapid development of whole genome sequencing technology in plants, the *TPP* gene family has been identified in numerous species and has been confirmed to be involved in the abiotic stress response of crops such as wheat, rice, and maize [16–18]. As an important economic crop, research on the *TPP* gene family based on the genome level remains limited in peanut. Genus *Arachis* contains 81 species, most of which are diploid ( $2n = 2x = 20$ ), while the cultivated peanut (*Arachis hypogaea* L.) is allotetraploid (AABB,  $2n = 4x = 40$ ). Cytogenetic, phylogeographic and molecular-biological evidence suggested that allotetraploid *A. hypogaea* might be formed by the hybridization of diploid *A. duranensis* (AA) and *A. ipaensis* (BB), whose genome size is twice that of wild diploid [19–21]. The relatively large genome increases the genetic complexity of peanut. Here, we utilized bioinformatics techniques to identify the members of *TPP* gene family of peanut, and analyzed their gene structure, chromosome localization, cis-acting elements, and expression patterns at the genomic level, to provide a theoretical basis for further exploring the specific biological functions of this gene family and the molecular mechanism of abiotic stress-induced trehalose accumulation in peanut.

## Materials and methods

### Plant materials and treatment

The study focused on two peanut varieties, Huayu963 (salt-resistant) and Weihua22 (salt-sensitive), with a high oleic acid content and a large cultivation area in China. The peanut seeds

were immersed in distilled water for 4 hours, transferred to culture dishes containing moist filter paper, and subsequently germinated in the dark at 28°C for 2 days. The germinated peanut seeds were planted in polyethylene plastic pots with a closed bottom. The plastic pot had a diameter of 24 cm, a height of 25 cm, and was filled with seven kilograms of soil per pot. Three seedlings were left in each pot. The soil used in the experiment was yellow-brown soil. All treatments adopted standard and consistent water & fertilizer management. The potted experiment was conducted in a greenhouse at Baima Experimental Base of Nanjing Agricultural University in Lishui District, Nanjing City, Jiangsu Province, China (119°09'E, 31°35'N). The tested peanut varieties were provided by Liaocheng Academy of Agricultural Sciences.

The treatments of this experiment were divided into control (C) and salt stress (S) groups. The control treatment did not receive any sodium chloride. The salt stress treatment involved applying 2 L of 0.24 mol/L sodium chloride solution per pot before sowing, simulating a soil salt content of 4‰, which is considered stressful for production. The experiment utilized a randomized block design, with three replicates for each treatment. During the seedling and podding stages, six leaves of similar size were collected from different plants in each replicate, quick-frozen in liquid nitrogen, and stored at -80°C for subsequent experimental analysis.

### Phenotypic observation and physiological index measurements

Chlorophyll Fluorescence Imager (CF Imager, Ecotek, Beijing, China) was used to assess various parameters of peanut leaves from different treatments during the podding stage, including the PSII excitation energy capture efficiency (XE, expressed as  $F_v'/F_m'$ ), the electron transport rate (EF, expressed as  $F_q'/F_v'$ ), the PSII actual photochemical quantum efficiency (OE, expressed as  $F_q'/F_m'$ ), and the non-photochemical quenching coefficient (NPQ). FluorCam (Photon Systems Instruments, Czech) was used to observe chlorophyll fluorescence parameters of whole peanut plants from different treatments during the podding stage.

The determination of trehalose content was carried out using the anthrone-sulfuric acid method [22]. 0.5 grams of peanut leaf dry sample powder was accurately weighed, mixed with 5 mL of 0.5 mol/L trichloroacetic acid solution, and ground in an ice water bath. After being shaken at 0°C for 12 h, the mixture was centrifuged at 6000 r/min for 10 min. We took 2 mL of the supernatant, added 4 mL of 0.2% anthrone-sulfuric acid mixed reagent, heated it in boiling water for 5 minutes, cooled it down, and measured its absorbance at a wavelength of 590 nm.

### Identification and phylogenetic analysis of TPP gene family in peanut

The genomic data information for peanut (Ahypogaea\_530\_v1.0.fa, Ahypogaea\_530\_v1.0.gene.gff3, Ahypogaea\_530\_v1.0.cds.fa, Ahypogaea\_530\_v1.0.protein.fa), *Arabidopsis* (*Arabidopsis\_thaliana*.TAIR10.41.gff3, *Arabidopsis\_thaliana*.TAIR10.cds.all.fa), soybean (*Glycine\_max*.Glycine\_max\_v2.1.57.chr.gff3, *Glycine\_max*.Glycine\_max\_v2.1.cds.all.fa), and rice (*Oryza\_sativa*.IRGSP\_1.0.cds.all.fa, *Oryza\_sativa*.IRGSP\_1.0.51.gff3) was downloaded from the Ensemble database (<http://plants.ensembl.org/index.html>). The reference genome of cultivated peanut (*Arachis hypogaea* L.) used in this study was released by the team of Dr. David J. Bertioli. Taking *A. hypogaea* cv. Tifrunner as the material, using a whole-genome shotgun sequencing strategy, they completed the precise assembly of 20 chromosomes in the A and B subgenomes of allotetraploid peanut cultivars, so as to obtain the high-quality genome sequence of cultivated peanut [23]. The HMM profile for the trehalose-PPase domain (PF02358) was downloaded from the Pfam database (<https://www.ebi.ac.uk/interpro/entry/pfam>). Perl script was used to preliminarily screen protein sequences containing the trehalose-PPase domain in the peanut genome. Subsequently, HMMER 3.0 software was employed to construct a hidden Markov model specific to the peanut's TPP gene family. This newly

constructed model was then used for secondary retrieval in the peanut genome, with validation provided by the Pfam database and CDD tools (<http://www.ncbi.nlm.gov/cdd>).

Using MEGA 11 software, we conducted a comparative analysis of the *TPP* protein sequences identified in peanut with those previously characterized in *Arabidopsis*, rice, and soybean [24–26], and the result was visualized through a phylogenetic tree based on neighbor-joining method. The phylogenetic tree was refined using the evolview website (<https://evolgenius.info/evolview-v2/#login>). TBtools software was utilized to efficiently calculate the physicochemical properties of proteins in batches. WoLF PSORT website (<https://www.genscript.com/wolf-psort.html>) was used to predict subcellular localization information of proteins.

### Physical localization of *TPP* gene family on chromosomes in peanut

To determine the positions of *TPP* gene family members on the peanut chromosome, we retrieved the gene and chromosome information from the gff file of the peanut genome. Mapchart 2.32 was used to draw a distribution map of genes on chromosomes according to the length ratios of relevant genes and chromosomes.

### Prediction of conserved motifs and gene structural analysis of *AhTPPs*

Motifs in protein sequences of *AhTPPs* were predicted using MEME 5.5.3 online program (<http://meme-suite.org>). After obtaining the information on *AhTPPs* from the gff file, we input the relevant information into TBtools software, and draw a combined diagram of gene structure and conserved motifs.

### Protein multiple sequence alignment and analysis of the cis-acting elements of the *TPP* gene family members in peanut

We used MEGA 11 for protein multi-sequence alignment, and imported the aligned fasta file into GeneDoc software to analyze conserved protein domains.

Based on the sequences of identified target genes, we extracted 1500 bp of upstream genome sequences from *AhTPPs* and used the PlantCARE database (<http://bioinformatics.psb.ugent.be/webtools/plantcare/html/>) to predict and analyze the cis-acting elements within promoter regions.

### Collinearity analysis of *TPP* gene family members within the peanut genome and comparative genomic analysis of homologous relationships among different species

We used MCScanX on the biolinux system to conduct a collinearity analysis of the peanut genome and employed the Circos tool for enhanced visualization.

We used the Python version of MCScan to perform collinearity analysis between the genomes of peanut, *Arabidopsis*, rice, and soybean. The image beautification method was predicated on the codes provided on the official website ([https://github.com/tanghaibao/jcvi/wiki/MCscan-\(Python-version\)](https://github.com/tanghaibao/jcvi/wiki/MCscan-(Python-version))).

### Expression pattern analysis of *TPP* gene family in peanut under nitrogen deficiency, drought, and cold stress

We downloaded four sets of peanut's transcriptome data under nitrogen deficiency, drought, and cold stress from supplementary datasets of four publicly published SCI paper to analyze the expression patterns of *AhTPPs* under different abiotic stresses [27–30]. R program was

used to draw expression heatmaps. The FPKM (Fragments Per Kilobase of exon model per Million mapped fragments) matrixes of differential genes were extracted, and heatmaps were created through the Pheatmap package.

### Analysis of gene expression by real-time quantitative RT-PCR

Total RNA was extracted from the peanut leaves using Trizol Reagent (Invitrogen, San Diego, CA, USA) according to the manufacturer's instructions. The first strand of cDNAs was synthesized from 1  $\mu$ g of DNaseI-treated total RNA using HiScript III RT SuperMix reverse transcriptase kit (Vazyme Biotech Co., Ltd, China). Quantitative RT-PCR (qRT-PCR) assays were performed on the Bio-Rad CFX96 RT-PCR Detection system (Bio-Rad, Hercules, CA, USA) using ChamQ SYBR qPCR Master Mix (Vazyme Biotech Co., Ltd, China). The relative transcript levels among different samples were quantified by the  $2^{-\Delta\Delta C_t}$  method [31], using  $\beta$ -Actin as a reference gene for normalization [32]. The expression level of treatment C was used as a control and the relative expression level of treatment S was determined relative to the control.

## Results and analysis

### The effect of salt stress on the peanut growth and trehalose content in leaves

Salt stress had a significant impact on the growth status of two peanut varieties during the seedling stage, mainly manifested as delayed nutritional growth, stunted and weak plants, and reduced survival rate (S1 Fig). The salt-sensitive variety (Weihua22) displayed a distinct stress phenotype, with seedlings gradually succumbing to death after germination. Compared to the 89% survival rate of the salt-resistant variety (Huayu963), the survival rate of the salt-sensitive variety under salt stress was only 56%.

During the podding stage, we observed photosynthetic fluorescence parameters of the whole plants of two peanut varieties and found that salt stress significantly reduced parameters such as Fv/Fm and qN (Fig 1a). In addition, we also conducted an observation experiment on the leaves and found that under salt stress, parameters such as XE and OE' of leaves significantly decreased (Fig 1b). It is worth noting that an increase in NPQ was observed in whole plants or individual leaves under salt stress. The above results indicated that salt stress caused damage to the PSII reaction center in peanut leaves, inhibited PSII photochemical activity, reduced PSII primary light energy conversion efficiency, suppressed PSII potential activity, and disrupted the primary reaction process of peanut photosynthesis. Nevertheless, it also increased heat dissipation and provided light protection for PSII. In summary, high soil salinity has a long-term and persistent adverse impact on peanut production, affecting both nutritional and reproductive growth stages.

The measurement results of trehalose content in the leaves of two peanut varieties during the seedling and podding stages showed that, except for Weihua22 during the podding stage which did not show significant differences between treatments, the trehalose content in leaves of other stages under salt stress was significantly higher than that of the control treatment, and the interaction effect between the variety and the growth stage was significant (Table 1). The correlation analysis between trehalose content and photosynthesis indices under control and salt stress at the seedling stage of peanut showed that the trehalose content in leaves was relatively low and had no significant correlation with photosynthetic indices under normal cultivation conditions, while it was significantly increased and had a significant positive correlation with photosynthetic indices under salt stress (S2 Fig). These findings suggest that the accumulation of trehalose has a positive effect on peanut adaptation to salt environments.

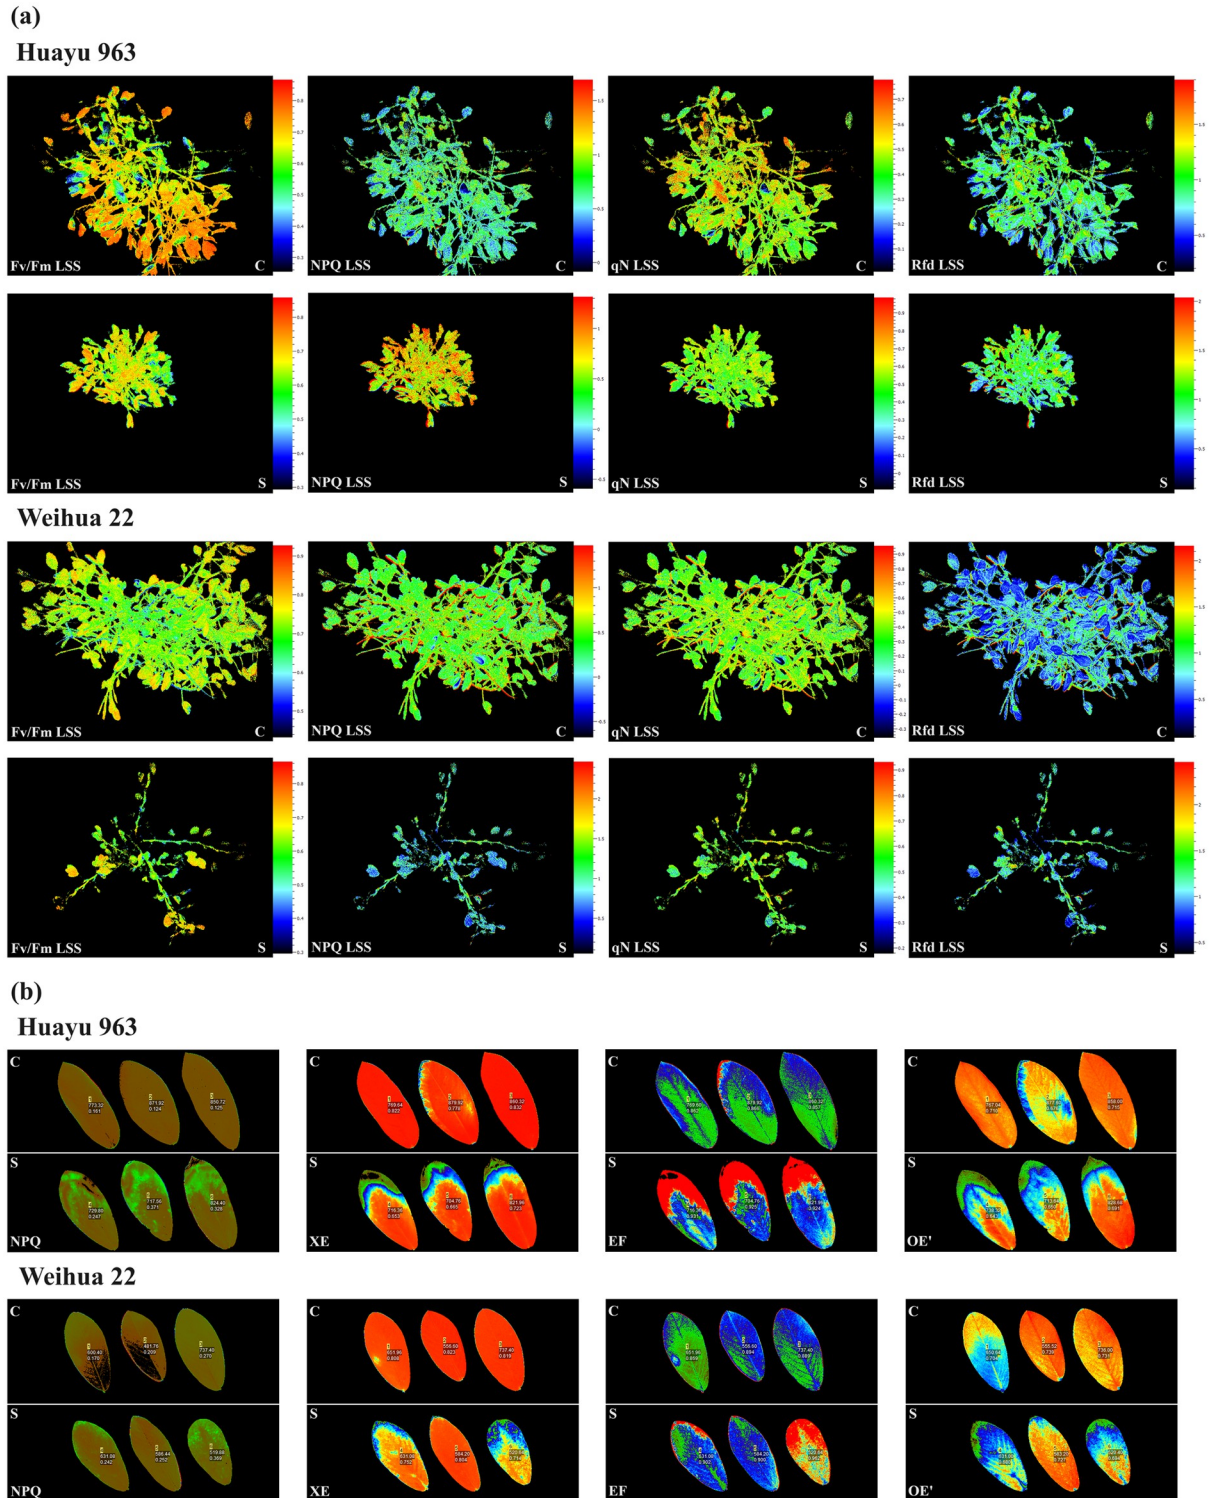

**Fig 1.** Fluorescence parameters of the whole plant (a) and single leaf (b) of two peanut varieties during podding stage under salt treatment (S) and normal cultivation treatment (C) in the chlorophyll fluorescence imaging system. Fv/Fm Lss means PSII quantum yield of light adapted sample at steady-state. NPQ\_Lss means steady-state non-photochemical quenching in light. qN\_Lss means non-photochemical quenching at steady-state. Rfd\_Lss means fluorescence decline ratio in steady-state. XE means the efficiency of excitation energy capture by open PSII reaction centers. EF means the coefficient of photochemical quenching. OE' means the actual photochemical efficiency of PSII in light.

<https://doi.org/10.1371/journal.pone.0305730.g001>

**Table 1. The effect of salt stress on trehalose content in leaves of two peanut varieties during the seedling and podding stages based on ANOVA.**

| Variety  | Growth stage            | Treatment            | Trehalose content ( $\mu\text{g/g}$ ) |
|----------|-------------------------|----------------------|---------------------------------------|
| Huayu963 | Seedling stage          | C                    | 1.846 $\pm$ 0.006 <sup>d</sup>        |
|          |                         | S                    | 1.872 $\pm$ 0.018 <sup>c</sup>        |
|          | Podding stage           | C                    | 1.895 $\pm$ 0.001 <sup>b</sup>        |
|          |                         | S                    | 1.916 $\pm$ 0.007 <sup>a</sup>        |
| Weihua22 | Seedling stage          | C                    | 1.806 $\pm$ 0.004 <sup>c</sup>        |
|          |                         | S                    | 1.829 $\pm$ 0.009 <sup>b</sup>        |
|          | Podding stage           | C                    | 1.889 $\pm$ 0.001 <sup>a</sup>        |
|          |                         | S                    | 1.899 $\pm$ 0.003 <sup>a</sup>        |
| F-value  | V                       | 71.85 <sup>**</sup>  |                                       |
|          | G                       | 340.13 <sup>**</sup> |                                       |
|          | T                       | 29.06 <sup>**</sup>  |                                       |
|          | V $\times$ G            | 15.78 <sup>**</sup>  |                                       |
|          | V $\times$ T            | 0.99                 |                                       |
|          | G $\times$ T            | 4.09                 |                                       |
|          | V $\times$ G $\times$ T | 0.45                 |                                       |

Different letters represent significant differences. The superscript of the largest value among treatments is marked as “a”, the superscript of the treatment with statistically significant reduction compared with treatment “a” is marked as “b”, the superscript of the treatment with statistically significant reduction compared with treatment “b” is marked as “c”, and the superscript of the treatment with statistically significant reduction compared with treatment “c” is marked as “d”. If the differences between treatments are not statistically significant, the superscripts remain the same letter.

\*\* indicates significance at 0.01 level.

<https://doi.org/10.1371/journal.pone.0305730.t001>

## Identification and phylogenetic analysis of TPP gene family members in peanut

45 *AhTPPs* were identified from the peanut genome through comprehensive screening and were assigned the names from *AhTPP1* to *AhTPP45* (Table 2). Analysis revealed a notable variation in the total length of *TPP* gene family members of peanut, with *AhTPP33* having the longest total length and *AhTPP25* having the shortest total length. For the CDS sequence, *AhTPP7* and *AhTPP34* have the longest length, both reaching 3069 bp, while *AhTPP25* has the shortest length, only 159 bp. Gene structure analysis shows that all family members contain exons and introns, but there is a significant difference in the number of exons, ranging from a maximum of 19 to a minimum of 2 (Fig 2). The number of amino acids ranges from 52 to 1022. The isoelectric point range is from 4.24 to 9.48. The relative molecular weight range is from 6.11 to 116.17 KD. Except for the protein encoded by *AhTPP45*, which was predicted to be hydrophobic, all other proteins are hydrophilic. Subcellular localization prediction indicated that 14 members were located in the cytoplasm, 2 members in the cytoskeleton, 13 members in the nucleus, 14 members in the chloroplast, and 2 members in the endoplasmic reticulum. It can be inferred that proteins encoded by the 45 *AhTPPs* may perform diverse biological functions in different organelles of peanut.

45 *AhTPPs* are relatively evenly distributed on 17 chromosomes of peanut. Among them, chromosomes 4, 6, and 16 do not contain *TPP* genes. There are a large number of *TPP* genes on chromosomes 3 and 13, each with 6. The number of *TPP* genes on chromosomes 2, 9, 10, 14, 18, and 19 is relatively small, all with only one gene (Fig 3).

To further understand the phylogenetic relationship of *TPP* genes, 102 protein sequences including monocotyledon (rice) and dicotyledon (*Arabidopsis*, soybean, peanut) were compared, and a phylogenetic tree was constructed (Fig 4). Phylogenetic analysis shows that *TPP* gene

Table 2. Physicochemical properties of TPP gene family proteins in *Arachis hypogaea* L.

| Gene name | Gene ID                          | CDS (bp) | Number of amino acids | Molecular weight | PI   | GRAVY  | Subcellular localization |
|-----------|----------------------------------|----------|-----------------------|------------------|------|--------|--------------------------|
| AhTPP1    | arahy.Tifrunner.gnm1.ann1.8AAC5A | 738      | 245                   | 27864.94         | 5.44 | -0.203 | Cytoplasm                |
| AhTPP2    | arahy.Tifrunner.gnm1.ann1.U769C2 | 1005     | 334                   | 38130.21         | 5.49 | -0.375 | Cytoskeleton             |
| AhTPP3    | arahy.Tifrunner.gnm1.ann1.9VZ5EJ | 2568     | 855                   | 96691.62         | 5.69 | -0.196 | Cytoplasm                |
| AhTPP4    | arahy.Tifrunner.gnm1.ann1.YY1VWG | 2751     | 916                   | 103010.51        | 7.36 | -0.349 | Nucleus                  |
| AhTPP5    | arahy.Tifrunner.gnm1.ann1.IE8W25 | 2589     | 862                   | 97108.04         | 5.88 | -0.189 | Chloroplast              |
| AhTPP6    | arahy.Tifrunner.gnm1.ann1.FJ2B1F | 1068     | 355                   | 39946.89         | 9.22 | -0.393 | Cytoplasm                |
| AhTPP7    | arahy.Tifrunner.gnm1.ann1.PK6QLT | 3069     | 1022                  | 116170.19        | 8.31 | -0.296 | Cytoplasm                |
| AhTPP8    | arahy.Tifrunner.gnm1.ann1.FTDL1P | 2922     | 973                   | 109322.73        | 5.81 | -0.26  | Nucleus                  |
| AhTPP9    | arahy.Tifrunner.gnm1.ann1.CK7SVG | 1338     | 445                   | 49874.19         | 7.59 | -0.256 | Cytoplasm                |
| AhTPP10   | arahy.Tifrunner.gnm1.ann1.Q3GMD8 | 2565     | 854                   | 96681.96         | 5.77 | -0.188 | Nucleus                  |
| AhTPP11   | arahy.Tifrunner.gnm1.ann1.SS1VDK | 1176     | 391                   | 43915.47         | 9.04 | -0.353 | Chloroplast              |
| AhTPP12   | arahy.Tifrunner.gnm1.ann1.51Y4LP | 1161     | 386                   | 43296.31         | 6.22 | -0.381 | Nucleus                  |
| AhTPP13   | arahy.Tifrunner.gnm1.ann1.PWAA2D | 2487     | 829                   | 94050.06         | 5.82 | -0.236 | Chloroplast              |
| AhTPP14   | arahy.Tifrunner.gnm1.ann1.B1753N | 930      | 309                   | 34895.17         | 9.07 | -0.348 | Endoplasmic reticulum    |
| AhTPP15   | arahy.Tifrunner.gnm1.ann1.B2J19D | 840      | 279                   | 31689.36         | 7.79 | -0.295 | Cytoskeleton             |
| AhTPP16   | arahy.Tifrunner.gnm1.ann1.0FY2NM | 1122     | 373                   | 42405.02         | 9.22 | -0.332 | Chloroplast              |
| AhTPP17   | arahy.Tifrunner.gnm1.ann1.G88L7W | 2550     | 849                   | 96026.65         | 5.81 | -0.226 | Chloroplast              |
| AhTPP18   | arahy.Tifrunner.gnm1.ann1.93VR75 | 2118     | 705                   | 80392            | 6.89 | -0.283 | Chloroplast              |
| AhTPP19   | arahy.Tifrunner.gnm1.ann1.E7HJTX | 306      | 101                   | 11442.06         | 6.27 | -0.4   | Cytoplasm                |
| AhTPP20   | arahy.Tifrunner.gnm1.ann1.G4A8LI | 519      | 172                   | 19717.64         | 5.81 | -0.32  | Cytoplasm                |
| AhTPP21   | arahy.Tifrunner.gnm1.ann1.AKPIOI | 2583     | 860                   | 96986.1          | 6.11 | -0.175 | Cytoplasm                |
| AhTPP22   | arahy.Tifrunner.gnm1.ann1.5Q8BGE | 1128     | 375                   | 42051.76         | 6.03 | -0.41  | Nucleus                  |
| AhTPP23   | arahy.Tifrunner.gnm1.ann1.FZMU71 | 2610     | 869                   | 98141.75         | 5.73 | -0.225 | Chloroplast              |
| AhTPP24   | arahy.Tifrunner.gnm1.ann1.4K8ZJG | 525      | 174                   | 19474.37         | 5.36 | -0.11  | Cytoplasm                |
| AhTPP25   | arahy.Tifrunner.gnm1.ann1.GS1QIE | 159      | 52                    | 6112.71          | 4.24 | -0.835 | Chloroplast              |
| AhTPP26   | arahy.Tifrunner.gnm1.ann1.83R1N2 | 303      | 100                   | 11240.15         | 4.54 | 0.613  | Chloroplast              |
| AhTPP27   | arahy.Tifrunner.gnm1.ann1.A0DAR9 | 2547     | 848                   | 96610.43         | 5.91 | -0.221 | Chloroplast              |
| AhTPP28   | arahy.Tifrunner.gnm1.ann1.1XW75L | 2550     | 849                   | 95996.62         | 5.81 | -0.225 | Chloroplast              |
| AhTPP29   | arahy.Tifrunner.gnm1.ann1.J3QXZL | 939      | 312                   | 35412.85         | 9.31 | -0.366 | Cytoplasm                |
| AhTPP30   | arahy.Tifrunner.gnm1.ann1.E48PAY | 2784     | 927                   | 104664.21        | 7.01 | -0.383 | Nucleus                  |
| AhTPP31   | arahy.Tifrunner.gnm1.ann1.KW1U5A | 984      | 327                   | 36737.21         | 9.18 | -0.378 | Endoplasmic reticulum    |
| AhTPP32   | arahy.Tifrunner.gnm1.ann1.DP0G5T | 942      | 313                   | 35206.75         | 9.48 | -0.296 | Chloroplast              |
| AhTPP33   | arahy.Tifrunner.gnm1.ann1.G2WE73 | 1122     | 373                   | 42431.04         | 9.33 | -0.343 | Chloroplast              |
| AhTPP34   | arahy.Tifrunner.gnm1.ann1.S5S9QI | 3069     | 1022                  | 116170.19        | 8.31 | -0.296 | Cytoplasm                |
| AhTPP35   | arahy.Tifrunner.gnm1.ann1.P5P8C7 | 1068     | 355                   | 39933.8          | 9.08 | -0.392 | Cytoplasm                |
| AhTPP36   | arahy.Tifrunner.gnm1.ann1.CM68RF | 2589     | 862                   | 97165.09         | 5.79 | -0.184 | Nucleus                  |
| AhTPP37   | arahy.Tifrunner.gnm1.ann1.FP7P7G | 2562     | 853                   | 96618.88         | 5.77 | -0.195 | Nucleus                  |
| AhTPP38   | arahy.Tifrunner.gnm1.ann1.FIK9JS | 1167     | 388                   | 43213.37         | 6.57 | -0.275 | Cytoplasm                |
| AhTPP39   | arahy.Tifrunner.gnm1.ann1.RIH8EG | 3012     | 1003                  | 113229.45        | 6.22 | -0.275 | Nucleus                  |
| AhTPP40   | arahy.Tifrunner.gnm1.ann1.EKX8HF | 639      | 212                   | 23489.3          | 5.09 | -0.433 | Nucleus                  |
| AhTPP41   | arahy.Tifrunner.gnm1.ann1.S15BQI | 1122     | 374                   | 41950.96         | 9.12 | -0.472 | Chloroplast              |
| AhTPP42   | arahy.Tifrunner.gnm1.ann1.C51V2Y | 591      | 196                   | 22127.73         | 5.72 | -0.706 | Nucleus                  |
| AhTPP43   | arahy.Tifrunner.gnm1.ann1.0S0AWB | 591      | 196                   | 22127.73         | 5.72 | -0.706 | Nucleus                  |
| AhTPP44   | arahy.Tifrunner.gnm1.ann1.BL0RCS | 2544     | 847                   | 95865.65         | 5.6  | -0.216 | Nucleus                  |
| AhTPP45   | arahy.Tifrunner.gnm1.ann1.7Q19EE | 390      | 129                   | 14541.95         | 5.86 | 0.117  | Cytoplasm                |

<https://doi.org/10.1371/journal.pone.0305730.t002>



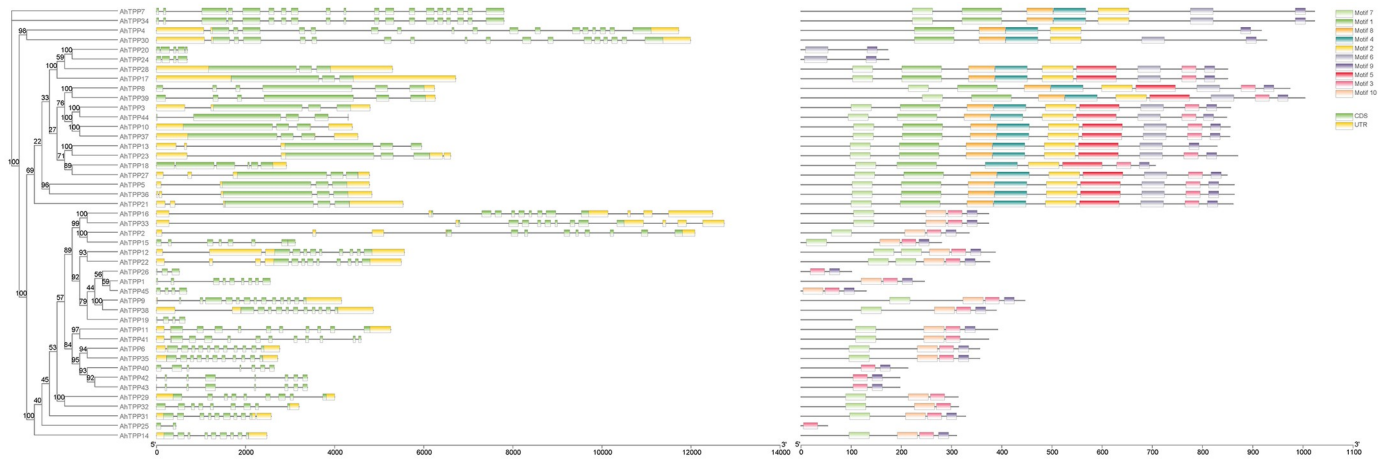

**Fig 2. Analysis of gene structures and conserved motifs in the phylogenetic tree of 45 *AhTPPs*.** The phylogenetic tree was constructed using the NJ method. Exons and introns are shown as rectangles and lines, respectively. Ten conserved motifs predicted in proteins coded by *AhTPPs* are shown as differently colored boxes.

<https://doi.org/10.1371/journal.pone.0305730.g002>

family members of peanut can be divided into three subgroups. The first subgroup has 25 members from peanut, and all genes from soybean are clustered in this group, indicating that the *AhTPPs* of this subgroup have high homology with soybeans. The second and third subgroups have 12 and 8 members from peanut, respectively. The genes from *Arabidopsis* are concentrated in the second and third subgroups, while rice genes are distributed in all subgroups.

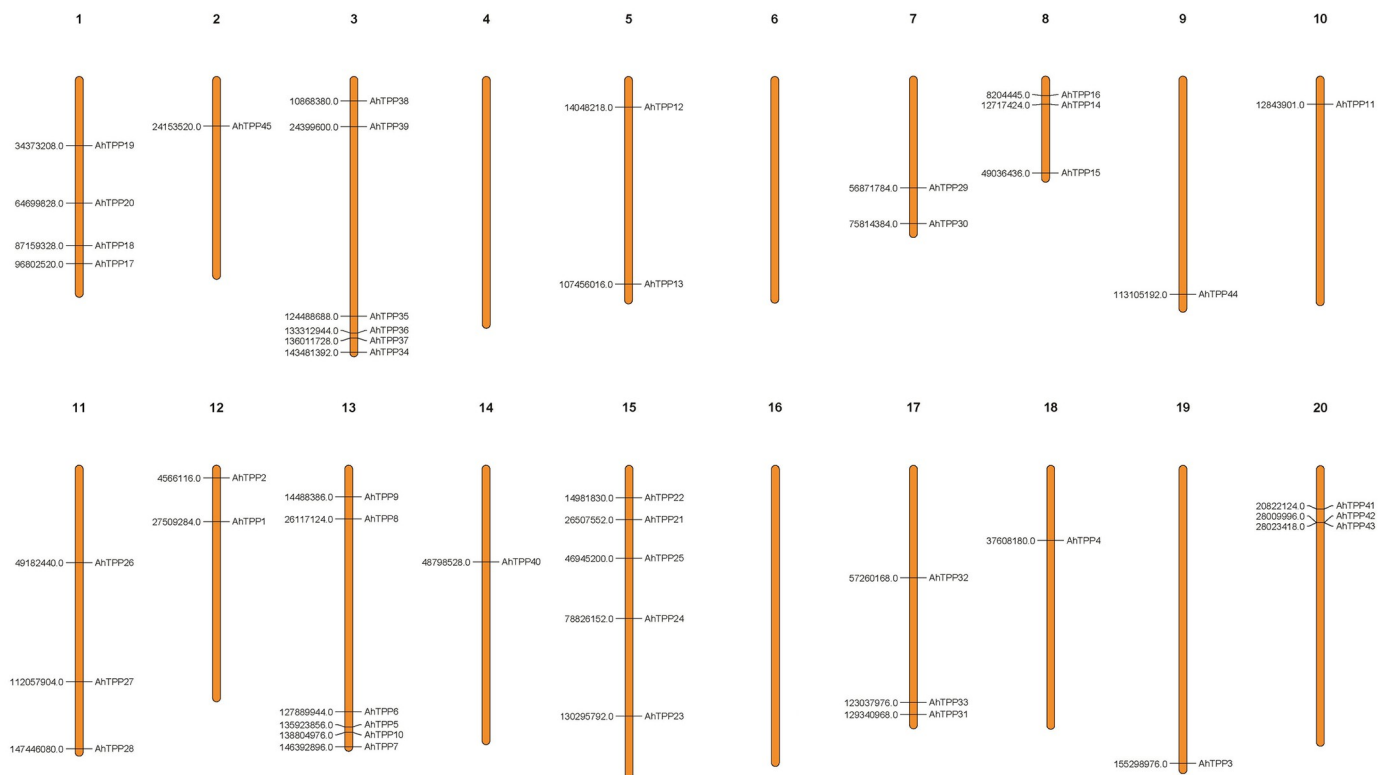

**Fig 3. Chromosomal distribution of TPP genes in the peanut genome.** The chromosome number and the specific location of genes on chromosomes are displayed in the figure.

<https://doi.org/10.1371/journal.pone.0305730.g003>

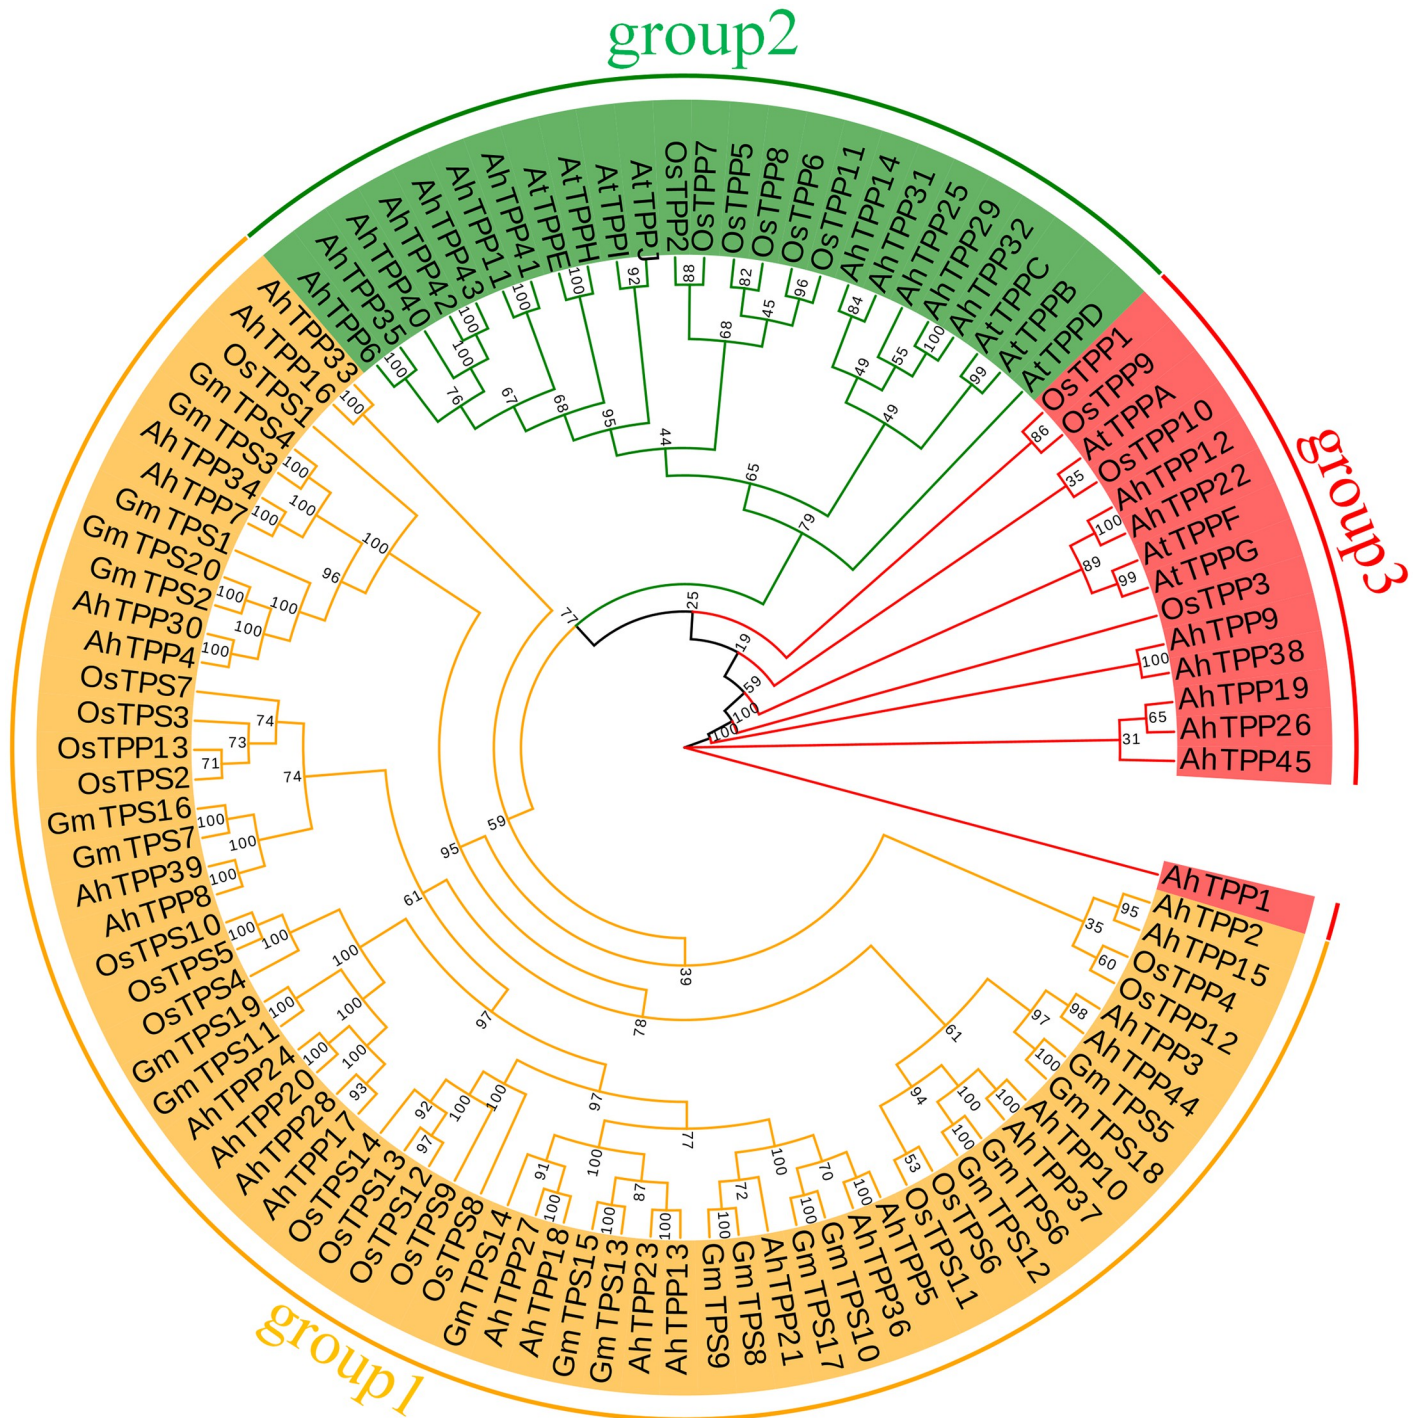

Fig 4. Systematic evolution of TPP proteins in *Arachis hypogaea*, *Glycine max*, *Oryza sativa*, and *Arabidopsis thaliana* by the neighbor-joining method.

<https://doi.org/10.1371/journal.pone.0305730.g004>

### Motif analysis and multiple sequence alignment of proteins encoded by *AhTPPs*

Through Pfam database and CDD tools validation, it was found that all 45 *AhTPPs* contain Trehalose-PPase (TPP, PF02358) domain, some members contain Glyco\_transf\_20 (TPS, PF00982)

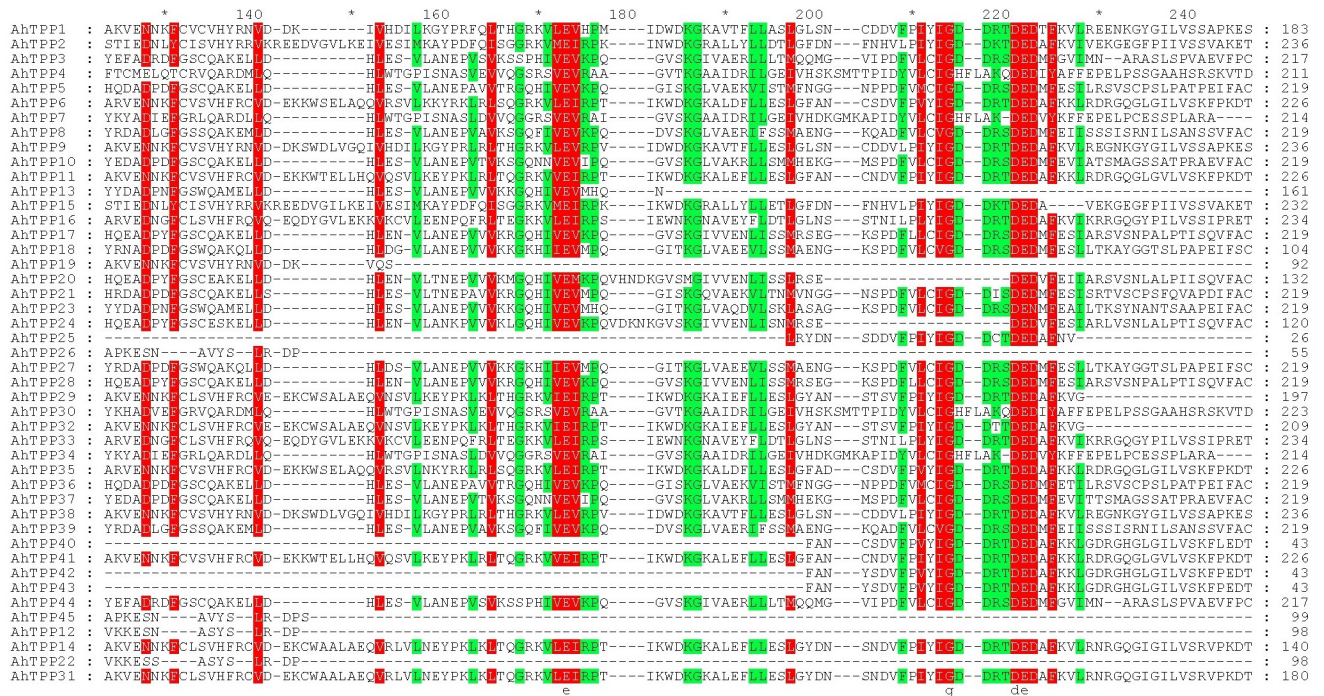

**Fig 5. Multiple alignment of amino acid sequences of AhTPPs.**

<https://doi.org/10.1371/journal.pone.0305730.g005>

and Trehalose-PPase double domains. Using the MEME program for motif analysis of AhTPPs, it was found that AhTPPs have a total of 10 conserved motifs. The coverage rates of motif 3, motif 7, and motif 9 in the gene family are as high as 82%, 73%, and 89%, respectively, possessing high conservatism (Fig 2). The protein multi-sequence alignment of AhTPPs further supports the observation of high amino acid sequence similarity within these three motif regions (Fig 5).

### Analysis of cis-acting elements of AhTPPs

The analysis of the cis-acting elements located within the 1500 bp regions of the upstream transcription start site of AhTPPs revealed that the majority of members possess more than ten cis-acting elements, with many of the elements being duplicated (Fig 6a). The cis-acting elements mainly include light responsive elements (Box 4, G-Box, GT1-motif, etc.), plant hormone responsive elements (ABRE, ERE, CGTCA-motif, etc.), and stress responsive elements (MYC, ARE, STRE, etc.) (Fig 6b; S1 Table), indicating that TPP gene family in peanut may have important regulatory roles in various biological processes.

### Collinearity analysis of TPP family genes within the peanut genome and homologous relationships between peanut and rice, Arabidopsis, and soybean

The gene copies present on the genome serve as valuable references for gene evolution analysis. Segmental duplication and tandem duplication are the primary mechanisms for the expansion of plant gene families [33]. The collinearity analysis within the peanut genome showed that only one pair of genes (AhTPP42 and AhTPP43) in TPP gene family experienced tandem duplication on chromosome 20, with no segmental duplication events observed (Fig 7).

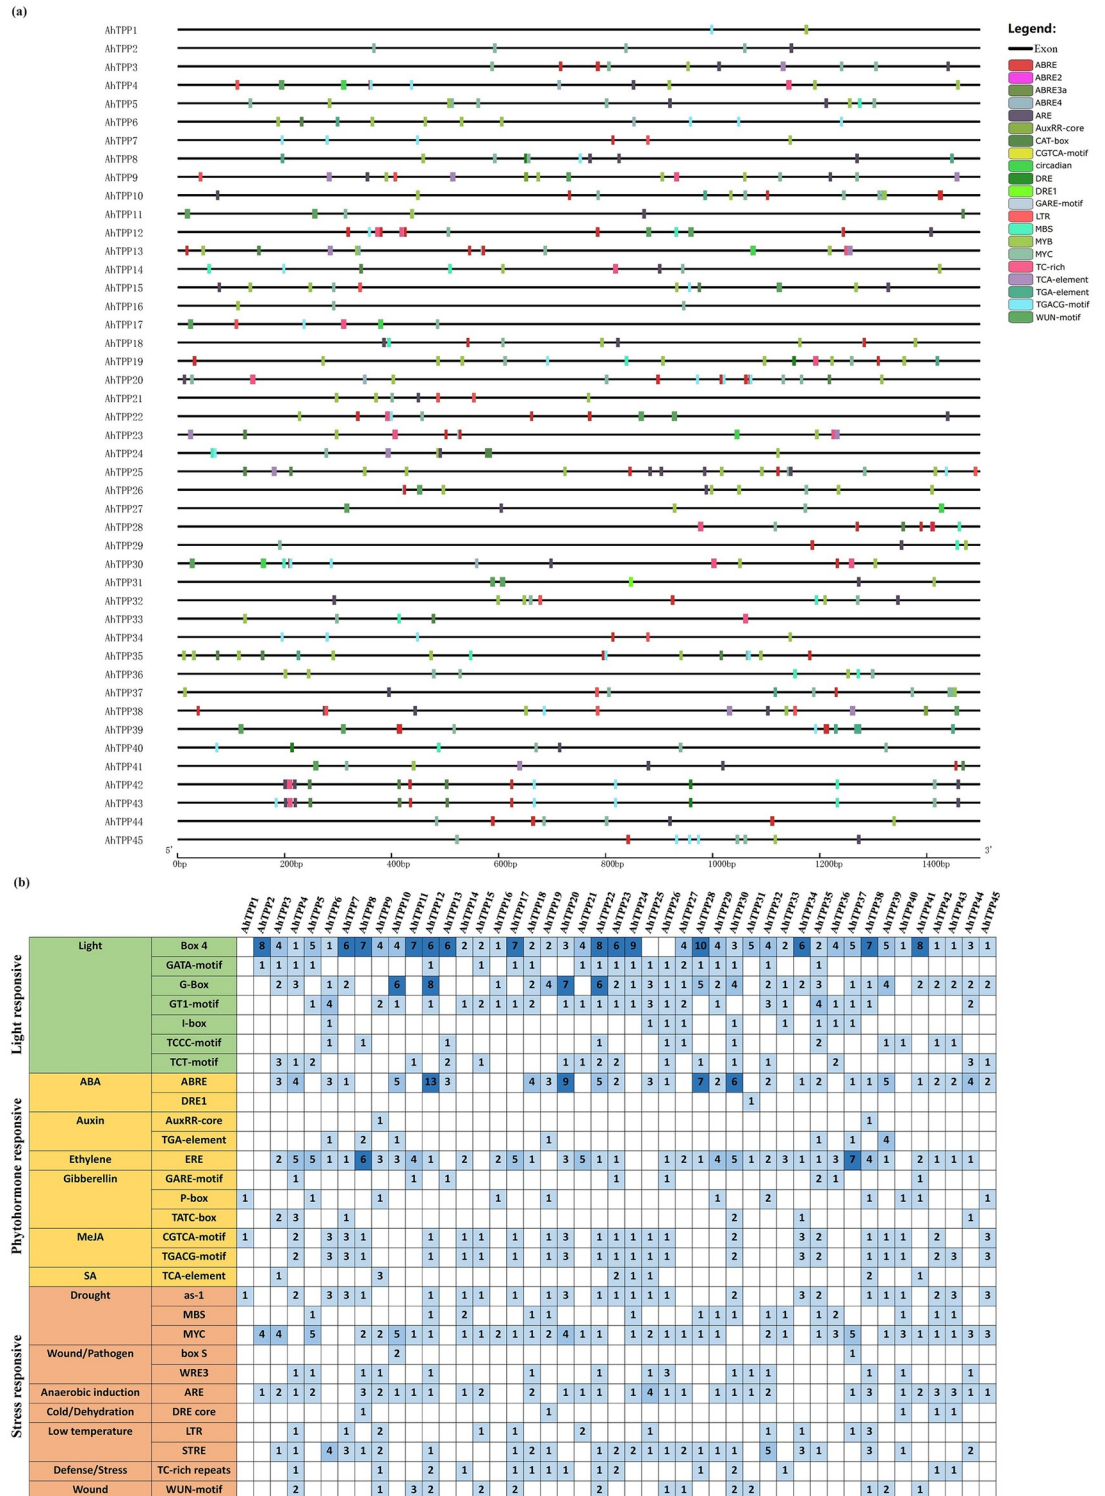

Fig 6. The distribution of cis-acting elements in promoters of the TPP gene family members in peanut (a) and statistics on the numbers of cis-acting elements related to major physiological processes (b).

<https://doi.org/10.1371/journal.pone.0305730.g006>

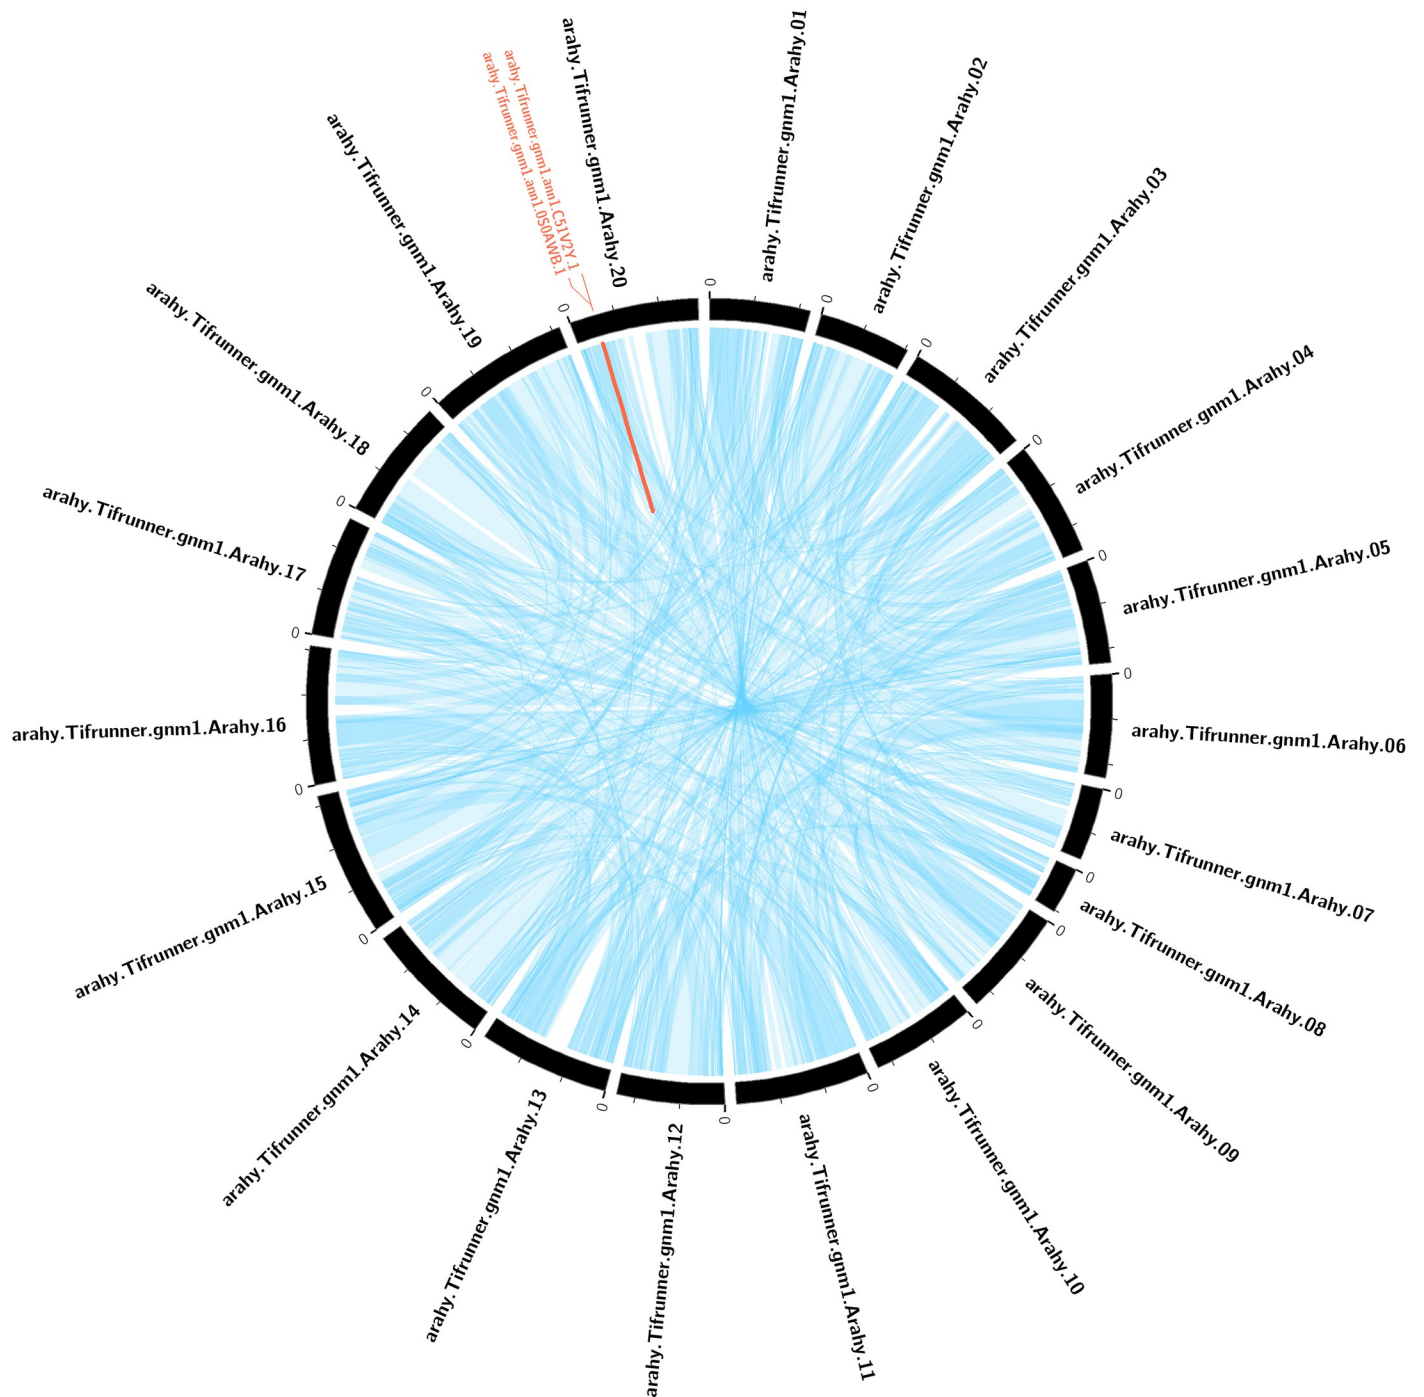

**Fig 7. Inter-chromosomal relationships of genes in the peanut genome.** Blue lines indicate all synteny blocks in the peanut genome, and the red line indicates tandemly duplicated *TPP* gene pairs.

<https://doi.org/10.1371/journal.pone.0305730.g007>

We constructed homologous maps of peanuts with three representative plants, including two dicotyledonous plants (*Arabidopsis thaliana*, *Glycine max*) and one monocotyledonous plant (*Oryza sativa japonica*). The results showed that no collinearity was detected between *AhTPPs* and rice genes, and 22 *AhTPPs* were collinear with genes from soybean (31) and

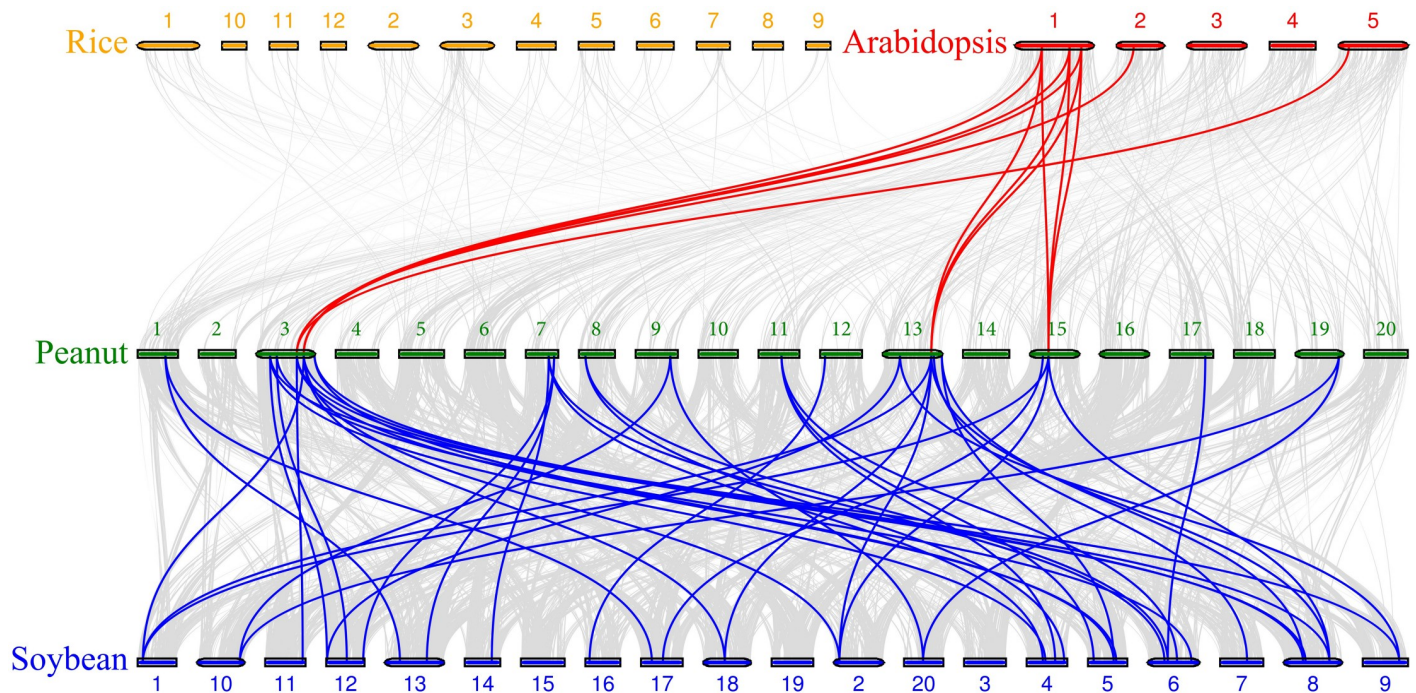

**Fig 8. Collinearity relationship of *TPP* genes in peanut, soybean, rice, and *Arabidopsis*.**

<https://doi.org/10.1371/journal.pone.0305730.g008>

*Arabidopsis* (9). The number of homologous gene pairs between these species was 45 and 11, respectively, suggesting that these homologous gene pairs were formed through gene replication during species differentiation (Fig 8; S2 Table).

### Expression pattern analysis of *TPP* gene family in peanut under low temperature, drought, and water-nitrogen colimitation conditions based on transcriptome data

We conducted expression pattern analysis of *TPP* gene family in peanut under low temperature, drought, and water-nitrogen colimitation conditions using four publicly available transcriptome datasets. Analysis has found that the accumulation of trehalose is of great significance for peanut to resist low-temperature damage. The low-temperature environment significantly induces the upregulation of most *TPP* gene family members in leaves, especially in cold-resistant varieties (Fig 9a; S3 Table). Drought stress significantly upregulates the expression of most *TPP* gene family members in roots, whereas their expression is inhibited in leaves (Fig 9b; S3 Table). Soil nitrogen deficiency inhibits the expression of *TPP* genes in leaves, and the inhibitory effect is particularly pronounced under the water-nitrogen colimitation condition (Fig 9c; S3 Table). Among them, significant increases were detected in the expression levels of *AhTPP13*, *AhTPP17*, *AhTPP21*, *AhTPP23*, and *AhTPP36* in cold-stressed leaves and drought-stressed roots, suggesting that they have regulatory effects on stress adaptation across diverse environmental conditions.

### Relative expression analysis of *TPP* family genes under salt stress in peanut by qRT-PCR

To further investigate the response of *TPP* gene family to salt stress in peanut, we utilized qRT-PCR to assess the relative expression levels of 45 *AhTPPs*. The information on primers for qRT-PCR analysis is listed in S4 Table.

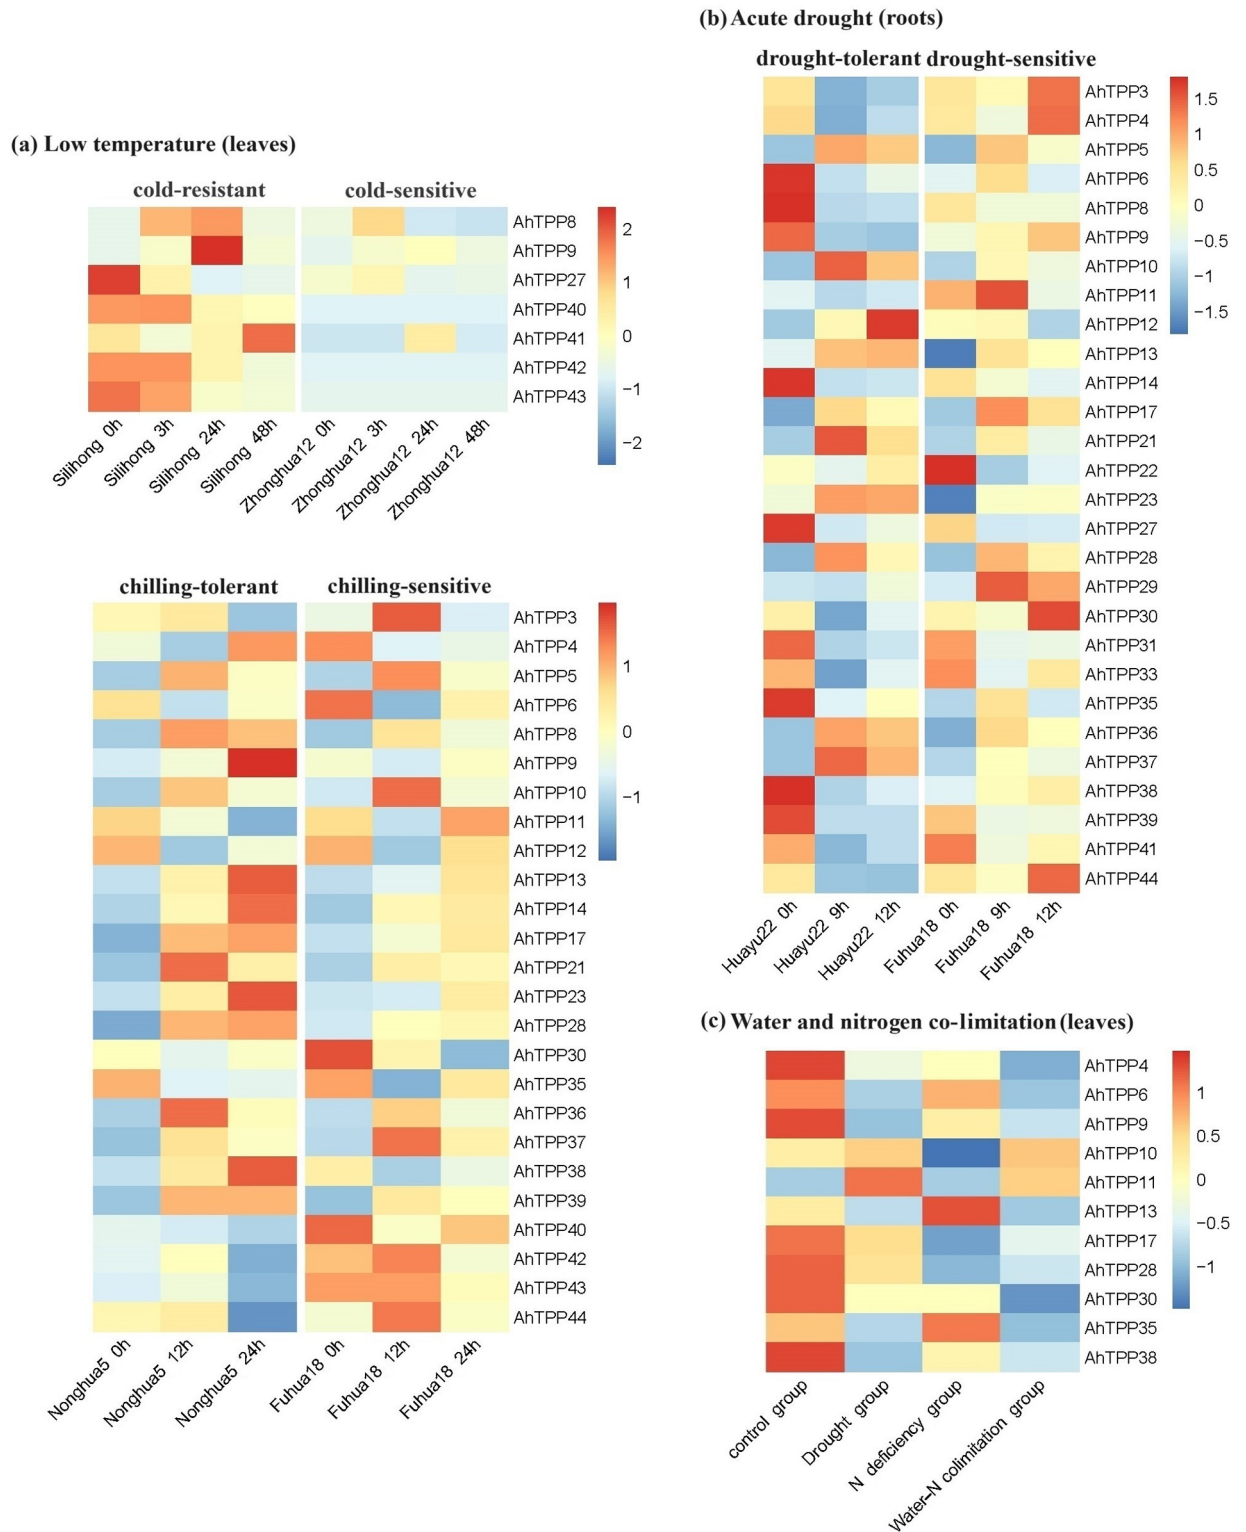

**Fig 9. Expression pattern analysis of *AhTPPs* under low temperature, acute drought, and water-nitrogen co-limitation treatment based on publicly available transcriptome data.**

<https://doi.org/10.1371/journal.pone.0305730.g009>

The results showed that most *AhTPPs* with differential expression under salt stress were upregulated. During the seedling stage of the salt-resistant variety (Huayu963), the relative expression levels of 24 *AhTPPs* were significantly upregulated, while during the podding stage, the relative expression levels of 10 *AhTPPs* were significantly upregulated. For the salt-sensitive variety (Weihua22), the relative expression levels of 19 *AhTPPs* were significantly upregulated during the seedling stage, while the relative expression levels of 6 *AhTPPs* were significantly upregulated during the podding stage, and the quantity was significantly lower than Huayu963 (Fig 10). Among them, some high expression genes were active, such as *AhTPP18*, *AhTPP25*, and *AhTPP39*, which were significantly upregulated under salt stress in two varieties and different growth stages (S3 Fig). It is speculated that they play a crucial positive role in promoting trehalose synthesis in peanut leaves to cope with soil salt damage.

## Discussion

### **Trehalose and its precursor substances, which are vital components of the osmoregulatory system, significantly contribute to plant resistance to abiotic stress**

Trehalose is a typical stress metabolite that effectively maintains the stability of cell membranes and macromolecules. When living organisms are growing under optimal conditions, they do not accumulate large amounts of trehalose. However, under stressful conditions such as nitrogen starvation, drought, extreme heat, and saline alkaline environments, trehalose accumulates rapidly [34, 35]. The chemical properties of trehalose are very stable, and it is not easy to decompose even under high temperatures and acidic conditions. At the same time, trehalose lacks reducing terminals related to the formation of glycosidic bonds, making it less prone to Maillard reactions. Trehalose's ability to form a glassy structure allows it to stabilize proteins and lipids in membranes under water deficiency or low-temperature conditions, indicating that trehalose has a strong anti-dehydration effect and protects biological structures from abiotic stress damage such as high temperature, drought, and high salinity [36, 37].

Despite the extremely low levels of trehalose in higher plants, recent studies have demonstrated that trace amounts of trehalose and its precursor T6P are involved in a series of physiological processes such as embryonic development, flower induction, senescence regulation, seed filling, and response to biotic and abiotic stress in plants [38–41]. Peanut can improve the adaptability to salt stress by regulating a series of secondary metabolic processes, and significantly affect the expression of core genes in the process of flavonoids biosynthesis, phenylpropanoid biosynthesis, starch and sugar metabolism, nitrogen metabolism, circadian rhythm and so on [42]. Previous studies on the metabolomic data of leaves from two peanut genotypes under salt stress have confirmed that trehalose-6-phosphate and D-trehalose are important differential metabolites, indicating that trehalose biosynthesis plays an active role in the response of peanut leaves to salt stress [43].

The sugar signaling pathway significantly impacts resistance to abiotic stress in plants, with the T6P pathway serving as a crucial component. This pathway not only participates in stress signal transduction but also regulates secondary metabolite production [44]. The intermediate product T6P, which is involved in the synthesis of trehalose, plays an important role in regulating the sucrose content and transportation of plants [45]. It has been suggested in several studies that changes in T6P content enhance plant stress resistance in the trehalose metabolism pathway, rather than trehalose itself. T6P can interact with Sucrose non-fermenting related kinase-1 (SnRK1) to regulate the allocation and utilization of plant carbon, enabling plants to survive in adverse environments [46]. As an important osmotic regulator, trehalose maintains the osmotic potential in plants to resist salt-alkali stress. Our study also confirmed that the



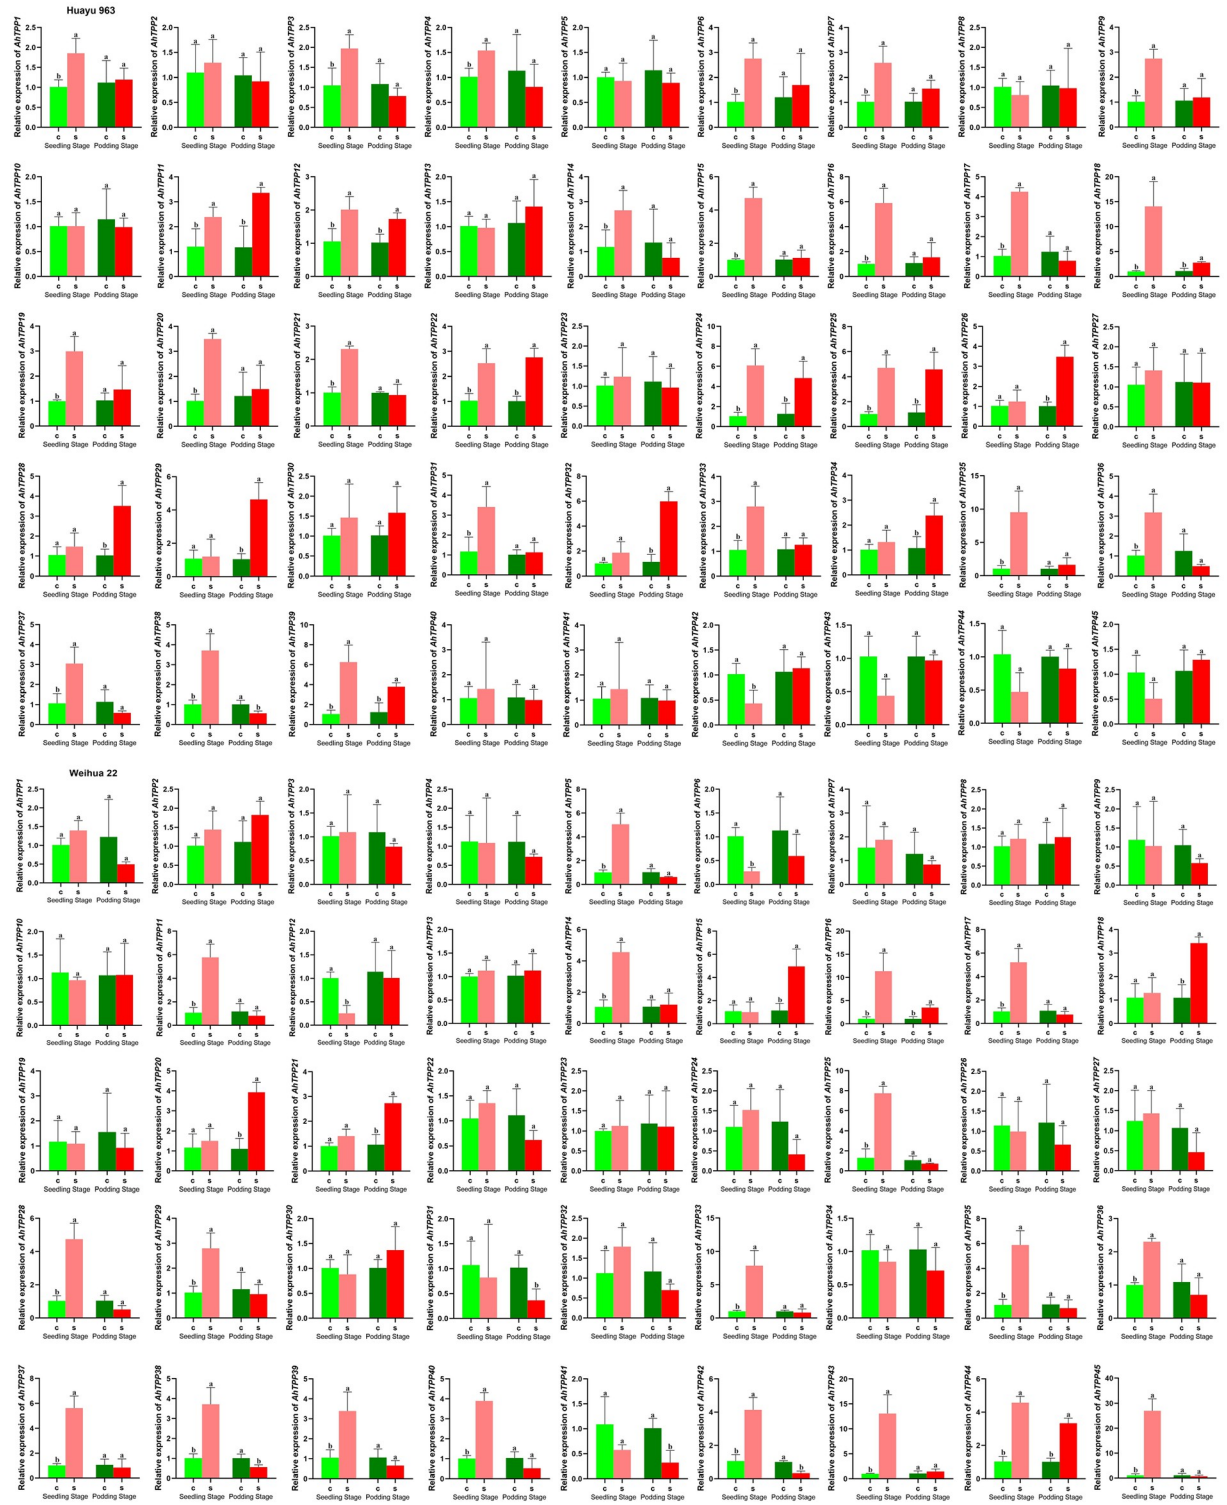

**Fig 10. qRT-PCR analysis of AhTPPs under salt treatment during seedling stage and podding stage, respectively.**

<https://doi.org/10.1371/journal.pone.0305730.g010>

trehalose content in peanut leaves under salt stress was higher than that in the control treatment, and reached a significant level in the seedling stage of both peanut varieties, indicating that the accumulation of trehalose has a positive significance for the survival of peanuts in saline-alkali environments.

### Identification, structural analyses, and function prediction of *TPP* gene family in peanut

A total of 45 *AhTPPs* were identified in this study. Based on amino acid sequences, phylogenetic relationships, and motif analysis, these 45 *AhTPPs* can be divided into three subgroups. The majority of *AhTPPs* have TPS domains at the N-terminal and TPP domains at the C-terminal, and all *AhTPPs* have at least one TPP domain. This characteristic is consistent with previous research findings in *Arabidopsis*, rice, and *Brachypodium distachyon* [24, 25, 47]. Among them, the average length of the 8 *AhTPPs* in the third subgroup is the shortest, and they have a distant genetic relationship with *TPP* genes of other species, suggesting that they may play unique functions in peanut. The first and second subgroups also have different characteristics. The number of introns among the members of the first subgroup varies greatly, with the highest being close to 20 and the lowest being only 2. It is also the subgroup with the richest types of motifs, with most members containing 10 different motifs. The number of introns among the members of the second subgroup is relatively consistent, ranging from 5 to 10, but there are fewer types of motifs, only appearing motif 3, motif 7, motif 9, and motif 10. The different characteristics between these two subgroups indicate that they may have different biological functions.

Each member of a gene family exhibits similar gene structures and functions, potentially as a result of expansion through species genome replication events [25, 48]. Compared to other eukaryotes, plants typically have a higher rate of genome replication [49]. Previous studies have identified 10, 13, and 26 *TPP* genes in *Arabidopsis*, rice, and maize, respectively [24, 25, 50]. The *TPP* gene family has significant differences in quantity among different species, indicating that this family may undergo gene duplication during plant evolution. The number of gene family members is related to the size of the species genome, and the larger the genome, the higher the probability of duplication events occurring. In *Arabidopsis*, 10 *TPP* genes have been identified, of which 8 are paired homologous genes [25, 51], while allopolyploid plants such as wheat seem to retain copies of all *TPP* genes from their ancestral species [16]. This study detected a tandem duplication event on chromosome 20 of peanut, suggesting that tandem duplication also plays a role in the expansion of *TPP* gene family.

The characteristics of gene response are closely related to the cis-acting elements of the promoter. Almost all promoters of *AhTPPs* contain cis-acting elements related to light response. All *AhTPPs* contain a large number of hormone-responsive elements. Among them, more than half of the gene family members contain methyl jasmonate responsive elements, with *AhTPP6*, *AhTPP7*, *AhTPP20*, *AhTPP34*, and *AhTPP45* being more prominent. Methyl jasmonate plays an important role in plant adaptation to low temperatures and resistance to pests [52, 53]. Some members also contain salicylic acid-responsive elements, which can enhance the drought resistance of plant seedlings and promote seed germination and seedling growth under salt stress to a certain extent [54]. The number of abscisic acid-responsive elements in *AhTPP12* is the highest, suggesting that it may be involved in ABA signal response. In terms of stress response, more than half of the gene family members contain drought, low temperature, and anaerobic response elements, suggesting that the *TPP* gene family plays an important role in peanut resistance to abiotic stress. The enhancement of phenolic metabolism in plants caused by mechanical damage is a physiological response of plants to accelerate wound

healing. Some members contain wound response elements, which may play a certain role in peanut wound recovery.

### **TPP genes enhance stress resistance by regulating trehalose synthesis in plants**

By inducing the expression of *TPP* genes to regulate the trehalose metabolism pathway, it is possible to increase the trehalose content in plants, thereby enhancing their tolerance to various abiotic stresses. According to research, the expression levels of *TPS* and *TPP* genes in *Arabidopsis* are positively correlated with trehalose content under high temperature stress [55, 56]. The 10 members of *TPP* gene family in *Arabidopsis* have different spatiotemporal expression patterns and stress response patterns. Among them, *AtTPPD* is involved in regulating sugar metabolism under salt conditions, and overexpression leads to an accumulation of starch and soluble sugars. It is currently the only gene in *TPP* gene family of *Arabidopsis* known to be related to salt stress [11]. Overexpression of *AtTPPF* increased the content of trehalose, sucrose, and soluble sugars under drought conditions, while upregulating the expression levels of drought responsive genes [57]. Among the 13 *TPP* genes of rice, overexpression of *OsTPP1* increased endogenous trehalose content and improved the survival rate of rice under low temperature stress [24]. The expression of *OsTPP2* is regulated by stress such as low temperature, drought, salt, and ABA [58]. Overexpression of *OsTPP3* enhanced the tolerance of rice plants to PEG stress, and gene expression analysis showed that the expression levels of genes related to stress response and ABA synthesis were upregulated [17]. Overexpression of *OsTPP7* increased the germination rate of seeds under anaerobic conditions and improved the seedling rate of rice direct seeding [59].

The response of genes involved in the trehalose metabolism pathway of plants to abiotic stress is closely associated with the presence of inducible cis-acting elements in their promoters' regions. Research has shown that the anaerobic responsive elements ARE and GC-motif of *OsTPP3* are responsible for its high expression during seed germination under hypoxic conditions [60]. Under high temperature stress, the expression of *RcTPS7b* in rose significantly increased, and there were multiple ABA responsive elements in the promoter of this gene. It is speculated that *RcTPS7b* may be involved in the ABA signaling pathway for heat stress resistance [61]. *CsTPPs*' promoters are rich in various cis-acting elements, which may be involved in response processes of abiotic stress such as low temperature and drought in tea plants [62]. Our study also found that the promoter regions of *TPP* gene family members in peanut contain multiple stress-responsive and hormone-responsive elements. Hormone-responsive elements mainly include ABRE, ERE, P-box, CGTCA-motif, and TGACG-motif, while stress-responsive elements mainly include MYC, MBS, ARE, and STRE, further indicating that this gene family plays an important role in regulating peanut growth and development and stress resistance processes.

Various osmotic regulatory substances exist in plants, including betaine, proline, and soluble proteins. Overexpression of genes related to the trehalose metabolism pathway can increase the content of proline and soluble proteins, and improve plant salt tolerance [12, 63]. The deposition of lignin may serve as a hydrophobic barrier to prevent ions from entering the plant xylem and reduce the damage of salt stress to plant tissues [64]. Research has shown that the significant improvement in salt tolerance of transgenic rice lines overexpressing *OsTPS8* is mainly due to *OsTPS8*'s function to promote lignin deposition in rice through ABA signaling [65].

Our study analyzed the transcriptome data of the peanut *TPP* gene family and found that most *AhTPPs* have a significant response to low temperature and drought stress. Furthermore,

we employed quantitative real-time PCR to analyze the expression patterns of *AhTPPs* under salt stress and identified several genes that are responsive to salt stress. We found that the expression levels of most members of the peanut *TPP* gene family increased to varying degrees under salt stress. Among them, *AhTPP18*, *AhTPP25*, and *AhTPP39* were significantly upregulated in both varieties and exhibited a long-lasting response. It is speculated that these genes regulate trehalose synthesis and play an important role in peanut's resistance to salt stress.

Salt tolerance of plants is a complex quantitative trait controlled by multiple genes [66]. During the response to salt stress, a large number of genes are activated, leading to the accumulation of many secondary metabolites involved in stress resistance, including trehalose, which are regulated by specific TFs [67]. At present, there are many studies on physiological changes of cultivated peanut under salt stress, but little attention has been paid to trehalose in the response of peanut to salt stress, and the research on its molecular mechanism is mostly focused on a few independent genes, so it is not easy to obtain systematic genetic information against salt stress. In the future, we plan to screen the key genes regulating trehalose biosynthesis under salt stress through the joint analysis of multiomics, combined with the currently identified active members of *TPP* gene family in peanut, and clarify their biological functions and regulatory networks by gene editing, in order to provide more insights into the molecular mechanism of *AhTPPs* regulating trehalose accumulation and improving salt tolerance of peanut.

## Conclusion

This study conducted the genome-wide identification of *TPP* gene family in peanut and analyzed its expression patterns under salt stress. A total of 45 candidate *TPP* genes were identified in the peanut genome. Phylogenetic analysis showed that *AhTPPs* have highly conserved motifs and gene structures. Collinearity analysis suggested that tandem duplication may have played a role in the expansion of *TPP* gene family evolution in peanut. The analysis of cis-acting elements in the promoter regions of *AhTPPs* indicated that most of them are involved in various stress responses, providing a basis for the functional research of *AhTPPs*. Transcriptome data showed that *AhTPPs* respond to abiotic stress such as low temperature, drought, and nitrogen deficiency. In addition, the expression of *AhTPP18*, *AhTPP25*, and *AhTPP39* was significantly upregulated under salt stress. The specific regulatory mechanisms of *TPP* gene family in peanut growth, development, and stress adaptation should be further elucidated through genetic transformation experiments.

## Supporting information

**S1 Fig. Phenotypes of the salt-sensitive variety Weihua22 and the salt-resistant variety Huayu963 during seedling stage under salt treatment (S) and normal cultivation treatment (C).**

(DOCX)

**S2 Fig. Correlation analysis among trehalose content, the maximal quantum yield of PSII (Fv/Fm), net photosynthetic rate (Pn), stomatal conductance (Cond), actual photochemical efficiency of PSII ( $\Phi$ PSII), and chlorophyll content (SPAD) of control and salt stress treatments at the seedling stage of peanut.**

(DOCX)

**S3 Fig. Venn diagram of significantly upregulated *AhTPPs* under salt stress for two peanut varieties and two growth stages.**

(DOCX)

**S1 Table. The distribution of cis-acting elements in promoters of the TPP gene family members in peanut.**

(XLSX)

**S2 Table. Collinear analysis of TPP genes between *Arachis hypogaea*, *Arabidopsis thaliana*, and *Glycine max*.**

(XLSX)

**S3 Table. The FPKM values of *AhTPPs* in transcriptome data under low-temperature, acute drought, and water-nitrogen co-limitation stress.**

(XLSX)

**S4 Table. List of primers used in qRT-PCR analysis.**

(XLSX)

**S1 File.**

(FA)

**S2 File.**

(FA)

**S3 File.**

(FA)

## Author Contributions

**Data curation:** Yanfeng Zhang, Minxuan Cao, Fagang Yu.

**Formal analysis:** Yanfeng Zhang.

**Funding acquisition:** Qiuzhi Li, Fagang Yu.

**Methodology:** Yanfeng Zhang.

**Resources:** Qiuzhi Li.

**Software:** Yanfeng Zhang.

**Writing – original draft:** Yanfeng Zhang.

**Writing – review & editing:** Fagang Yu.

## References

1. Liao BS. A review on progress and prospects of peanut industry in China. *Chinese Journal of Oil Crop Sciences*, 2020; 42(2):161–166.
2. Zhang LW, Wang LW. Development status, existing problems and policy recommendations of peanut industry in China. *China Oils and Fats*, 2020; 45(11):116–122.
3. Rao Y, Peng T, Xue SW. Mechanisms of plant saline-alkaline tolerance. *Journal of Plant Physiology*, 2023; 281:153916. <https://doi.org/10.1016/j.jplph.2023.153916> PMID: 36645936
4. Zhu JF, Cui ZR, Wu CH, Deng C, Chen JH, Zhang HX. Research advances and prospect of saline and alkali land greening in China. *World Forestry Research*, 2018; 31(4):70–75.
5. Wen SQ, Yuan G, Zhang ZM, Zhang GC, Ci DW, Ding H, et al. Salt tolerance of peanut varieties at seedling stage: assessment and screening. *Journal of Agriculture*, 2021; 11(6):29–35.
6. Ci DW, Zhang ZM, Ding H, Song WW, Fu FP, Kang T, et al. Evaluation and selection indices of salinity tolerance in peanut seedling. *Acta Ecologica Sinica*, 2015; 35(3):805–814.
7. O'Hara LE, Paul MJ, Wingler A. How do sugars regulate plant growth and development? New insight into the role of trehalose-6-phosphate. *Molecular Plant*, 2013; 6(2):261–274. <https://doi.org/10.1093/mp/sss120> PMID: 23100484

8. Schlupepmann H, Van Dijken A, Aghdasi M, Wobbles B, Paul M, Smeekens S. Trehalose mediated growth inhibition of *Arabidopsis* seedlings is due to trehalose-6-phosphate accumulation. *Plant Physiology*, 2004; 135(2):879–890.
9. Bell W, Sun WN, Hohmann S, Wera S, Reinders A, De Virgilio C, et al. Composition and functional analysis of the *Saccharomyces cerevisiae* trehalose synthase complex. *The Journal of Biological Chemistry*, 1998; 273(50):33311–33319.
10. Jiang H, Liu NN, Liu GL, Chi Z, Wang JM, Zhang LL, et al. Melanin production by a yeast strain XJ5-1 of *Aureobasidium melanogenum* isolated from the Taklimakan desert and its role in the yeast survival in stress environments. *Extremophiles*, 2016; 20(4):567–577.
11. Krasensky J, Broyart C, Rabanal F A, Jonak C. The redox-sensitive chloroplast trehalose-6-phosphate phosphatase *AtTPPD* regulates salt stress tolerance. *Antioxidants & Redox Signaling*, 2014; 21(9):1289–1304.
12. Li HW, Zang BS, Deng XW, Wang XP. Overexpression of the trehalose-6-phosphate synthase gene *OsTPS1* enhances abiotic stress tolerance in rice. *Planta*, 2011; 234(5):1007–1018.
13. Avonce N, Leyman B, Mascorro-Gallardo JO, Van Dijk P, Thevelein JM, Iturriaga G. The *Arabidopsis* trehalose-6-P synthase *AtTPS1* gene is a regulator of glucose, abscisic acid, and stress signaling. *Plant Physiology*, 2004; 136(3):3649–3659.
14. Rahman Md Mustafizur, Rahman Md Mizanor, Eom Joon-Seob, Jeon JS. Genome-wide identification, expression profiling and promoter analysis of trehalose-6-phosphate phosphatase gene family in rice. *Journal of Plant Biology*, 2021; 64(1):55–71.
15. Yang HL, Liu YJ, Wang CL, Zeng QY. Molecular Evolution of Trehalose-6-Phosphate Synthase (TPS) Gene Family in *Populus*, *Arabidopsis* and Rice. *Plos One*, 2012; 7(8):e42438.
16. Du LY, Li SM, Ding L, Cheng XX, Kang ZS, Mao HD. Genome-wide analysis of trehalose-6-phosphate phosphatases (TPP) gene family in wheat indicates their roles in plant development and stress response. *BMC Plant Biology*, 2022; 22(1):120. <https://doi.org/10.1186/s12870-022-03504-0> PMID: 35296251
17. Jiang DG, Chen WT, Gao JE, Yang F, Zhuang CX. Overexpression of the trehalose-6-phosphate phosphatase *OsTPP3* increases drought tolerance in rice. *Plant Biotechnology Reports*, 2019; 13(3):285–292.
18. Nuccio ML, Wu J, Mowers R, Zhou HP, Meghji M, Primavesi LF, et al. Expression of trehalose-6-phosphate phosphatase in maize ears improves yield in well-watered and drought conditions. *Nature Biotechnology*, 2015; 33(8):862–869. <https://doi.org/10.1038/nbt.3277> PMID: 26473199
19. Fávero AP, Simpson CE, Valls JFM, Vello NA, Study of the evolution of cultivated peanut through cross-ability studies among *Arachis ipaensis*, *A-duranensis*, and *A-hypogaea*. *Crop Science*, 2006; 46(4):1546–1552.
20. Grabile M, Chalup L, Robledo G, Seijo G. Genetic and geographic origin of domesticated peanut as evidenced by 5S rDNA and chloroplast DNA sequences. *Plant Systematics and Evolution*, 2012; 298(6):1151–1165.
21. Zhuang WJ, Chen H, Yang M, Wang JP, Pandey MK, Zhang C, et al. The genome of cultivated peanut provides insight into legume karyotypes, polyploid evolution and crop domestication. *Nature Genetics*, 2019; 51(5):865–876. <https://doi.org/10.1038/s41588-019-0402-2> PMID: 31043757
22. Xie DW, Wang XN, Fu LS, Sun J, Li ZF, Zheng W. Effect of exogenous trehalose on germ length and seedling freeze resistance of winter wheat under cold stress. *Journal of Triticeae Crops*, 2015; 35(2):215–223.
23. Bertioli DJ, Jenkins J, Clevenger J, Dudchenko O, Gao DY, Seijo G, et al. The genome sequence of segmental allotetraploid peanut *Arachis hypogaea*. *Nature Genetics*, 2019; 51(5):877–884.
24. Ge LF, Chao DY, Shi M, Zhu MZ, Gao JP, Lin HX. Overexpression of the trehalose-6-phosphate phosphatase gene *OsTPP1* confers stress tolerance in rice and results in the activation of stress responsive genes. *Planta*, 2008; 228:191–201.
25. Vandesteene Lies, Lorena López-Galvis Kevin Vanneste, Feil R, Maere S, Lammens W, et al. Expansive evolution of the trehalose-6-phosphate phosphatase gene family in *Arabidopsis*. *Plant Physiology*, 2012; 160:884–896.
26. Xie L, Wang ZX, Huang B. Genome-wide identification classification and expression of *TPS* family genes in soybean. *Chinese Journal of Oil Crop Sciences*, 2014; 36(2):160–167.
27. Ding H, Dai LX, Guo Q, Chen XS, Zhang GC, Feng H, et al. Comprehensive transcriptome and metabolome analyses reveal primary molecular regulation pathways involved in peanut under water and nitrogen co-limitation. *International Journal of Molecular Sciences*, 2023; 24:13308. <https://doi.org/10.3390/ijms241713308> PMID: 37686113
28. Wang X, Liu Y, Han ZK, Chen YN, Huai DX, Kang YP, et al. Integrated transcriptomics and metabolomics analysis reveal key metabolism pathways contributing to cold tolerance in peanut. *Frontiers in Plant Science*, 2021; 12:752474. <https://doi.org/10.3389/fpls.2021.752474> PMID: 34899780

29. Wang J, Yu Y, Jiang CJ, Sun ZX, Wang XN, Wang ZY, et al. Comparative analysis of physiology-anatomy and transcriptome-metabolome involving acute drought stress response of root between two distinct peanut cultivars at seedling stage. *Environmental and Experimental Botany*, 2023; 214:105442.
30. Zhang H, Jiang CJ, Lei JN, Dong JL, Ren JY, Shi XL, et al. Comparative physiological and transcriptomic analyses reveal key regulatory networks and potential hub genes controlling peanut chilling tolerance. *Genomics*, 2022; 114(2):110285. <https://doi.org/10.1016/j.ygeno.2022.110285> PMID: 35124174
31. Livak KJ, Schmittgen TD. Analysis of relative gene expression data using real-time quantitative PCR and the  $2^{-\Delta\Delta CT}$  method. *Methods*, 2001; 25(4):402–408.
32. Chi XY, Yang QL, Pan LJ, Chen MN, He YA, Yang Z, et al. Isolation and characterization of fatty acid desaturase genes from peanut (*Arachis hypogaea* L.). *Plant Cell Rep*, 2011; 30(8):1393–1404.
33. Gu ZL, Cavalcanti A, Chen FC, Bouman P, Li WH. Extent of gene duplication in the genomes of drosophila, nematode, and yeast. *Molecular Biology and Evolution*, 2002; 19(3): 256–262. <https://doi.org/10.1093/oxfordjournals.molbev.a004079> PMID: 11861885
34. Tang B, Wang S, Wang SG, Wang HJ, Zhang JY, Cui SY. Invertebrate trehalose-6-phosphate synthase gene: genetic architecture, biochemistry, physiological function, and potential applications. *Frontiers in Physiology*, 2018; 9:30. <https://doi.org/10.3389/fphys.2018.00030> PMID: 29445344
35. Wang PL, Lei XJ, Lv JX, Gao CQ. Overexpression of the *ThTPS* gene enhanced salt and osmotic stress tolerance in *Tamarix hispida*. *Journal of Forestry Research*, 2022; 33(1):299–308.
36. Acosta-Pérez P, Camacho-Zamora BD, Espinoza-Sánchez EA, Gutierrez-Soto G, Zavala-García F, Abraham-Juarez MJ, et al. Characterization of trehalose-6-phosphate synthase and trehalose-6-phosphate phosphatase genes and analysis of its differential expression in maize (*Zea mays*) seedlings under drought stress. *Plants-Basel*, 2020; 9(3):315. <https://doi.org/10.3390/plants9030315> PMID: 32138235
37. Ma C, Wang ZQ, Kong BB, Lin TB. Exogenous trehalose differentially modulate antioxidant defense system in wheat callus during water deficit and subsequent recovery. *Plant Growth Regulation*, 2013; 70(3):275–285.
38. Kumar R, Bishop E, Bridges WC, Tharayil N, Sekhon RS. Sugar partitioning and source-sink interaction are key determinants of leaf senescence in maize. *Plant Cell and Environment*, 2019; 42(9): 2597–2611. <https://doi.org/10.1111/pce.13599> PMID: 31158300
39. Winkler A, Delatte TL, O'Hara LE, Primavesi LF, Jhurrea D, Paul MJ, et al. Trehalose 6-phosphate is required for the onset of leaf senescence associated with high carbon availability. *Plant Physiology*, 2012; 158(3):1241–1251. <https://doi.org/10.1104/pp.111.191908> PMID: 22247267
40. Wahl V, Ponnu J, Schlereth A, Arrivault S, Langenecker T, Franke A, et al. Regulation of flowering by Trehalose-6-Phosphate signaling in *Arabidopsis thaliana*. *Science*, 2013; 339(6120):704–707.
41. Zhao ML, Ni J, Chen MS, Xu ZF. Ectopic expression of *Jatropha curcas* TREHALOSE-6-PHOSPHATE PHOSPHATASE J causes late-flowering and heterostylous phenotypes in *Arabidopsis* but not in *Jatropha*. *International Journal of Molecular Sciences*, 2019; 20(9):2165.
42. Zhang H, Zhao XB, Sun QX, Yan CX, Wang J, Yuan CL, et al. Comparative transcriptome analysis reveals molecular defensive mechanism of *Arachis hypogaea* in response to salt stress. *International Journal of Genomics*, 2020.
43. Zhang N, Zhang H, Lv ZH, Bai BY, Ren JY, Shi XL, et al. Integrative multi-omics analysis reveals the crucial biological pathways involved in the adaptive response to NaCl stress in peanut seedlings. *Phytophysologia Plantarum*, 2024; 176(2): e14266. <https://doi.org/10.1111/ppl.14266> PMID: 38558467
44. Chen HY, Li XE, Li ZG. Sugar signaling and its role in plant response to environmental stress. *Biotechnology Bulletin*, 2022; 38(7):80–89.
45. Bischof S. Life is sweeter with trehalose 6-phosphate. *Plant Cell*, 2020; 32(6):1784–1785. <https://doi.org/10.1105/tpc.20.00276> PMID: 32276985
46. Paul MJ, Gonzalez-Urriarte A, Griffiths CA, Hassani-Pak K. The role of trehalose 6-phosphate in crop yield and resilience. *Plant Physiology*, 2018; 177(1):12–23. <https://doi.org/10.1104/pp.17.01634> PMID: 29592862
47. Wang S, Ouyang K, Wang K. Genome-wide identification, evolution, and expression analysis of *TPS* and *TPP* gene families in *Brachypodium distachyon*. *Plants-Basel*, 2019; 8(10):362.
48. Wang J, Sun N, Deng T, Zhang LD, Zuo KJ. Genome-wide cloning, identification, classification and functional analysis of cotton heat shock transcription factors in cotton (*Gossypium hirsutum*). *BMC Genomics*. 2014; 15:961.
49. Wei KF, Wang YM, Xie DX. Identification and expression profile analysis of the protein kinase gene superfamily in maize development. *Molecular Breeding*. 2014; 33(1):155–172.
50. Zhang Y, Chen H, Guan SJ, Luo HB, Deng M. Bioinformatics and Expression Analysis of TPP Family Genes in Maize. *Molecular Plant Breeding*, 2021; 19(8): 2450–2459.

51. Lunn JE. Gene families and evolution of trehalose metabolism in plants. *Functional Plant Biology*, 2007; 34(6):550–563. <https://doi.org/10.1071/FP06315> PMID: 32689383
52. Heitz T, Smirnova E, Marquis V, Poirier L. Metabolic control within the jasmonate biochemical pathway. *Plant and Cell Physiology*, 2019; 60(12):2621–2628. <https://doi.org/10.1093/pcp/pcz172> PMID: 31504918
53. Yu XX, Zhang WJ, Zhang Y, Zhang XJ, Lang DY, Zhang XH. The roles of methyl jasmonate to stress in plants. *Functional Plant Biology*, 2019; 46(3):197–212. <https://doi.org/10.1071/FP18106> PMID: 32172764
54. Vicente MRS, Plasencia J. Salicylic acid beyond defence: its role in plant growth and development. *Journal of experimental botany*, 2011; 62(10):3321–3338. <https://doi.org/10.1093/jxb/err031> PMID: 21357767
55. Kaplan F, Kopka J, Haskell DW, Zhao W, Schiller KC, Gatzke N, et al. Exploring the temperature-stress metabolome of *Arabidopsis*. *Plant Physiology*, 2004; 136(4):4159–4168.
56. Usadel B, Blaesing OE, Gibon Y, Retzlaff K, Hoehne M, Guenther M, et al. Global transcript levels respond to small changes of the carbon status during progressive exhaustion of carbohydrates in *Arabidopsis* rosettes. *Plant Physiology*, 2008; 146(4):1834–1861.
57. Lin QF, Yang J, Wang QL, Zhu H, Chen ZY, Dao YH, et al. Overexpression of the trehalose-6-phosphate phosphatase family gene *AtTPPF* improves the drought tolerance of *Arabidopsis thaliana*. *BMC Plant Biology*, 2019; 19(1):381.
58. Shima S, Matsui H, Tahara S, Imai R. Biochemical characterization of rice trehalose-6-phosphate phosphatases supports distinctive functions of these plant enzymes. *FEBS Journal*, 2007; 274(5):1192–1201. <https://doi.org/10.1111/j.1742-4658.2007.05658.x> PMID: 17257172
59. Kretzschmar T, Pelayo MAF, Trijatmiko KR, Gabunada LFM, Alam R, Jimenez R, et al. A trehalose-6-phosphate phosphatase enhances anaerobic germination tolerance in rice. *Nature Plants*, 2015; 1(9):15124. <https://doi.org/10.1038/nplants.2015.124> PMID: 27250677
60. Yang X, Cui XY, Li YL, Yang MY. Cloning and bioinformatics analysis of *OsTPP3* gene in *Oryza sativa*. *Molecular Plant Breeding*, 2018; 16(12):3785–3793.
61. Wei XR, Ling W, Ma YW, Du JL, Cao FX, Chen HX, et al. Genome-wide analysis of the trehalose-6-phosphate synthase gene family in rose (*Rosa chinensis*) and differential expression under heat stress. *Horticulturae*, 2022; 8(5):429.
62. Lv CJ, Li F, Wang MH, Yin ZX, Shang XW, Ma YC, et al. Identification and response of *TPP* gene family to low temperature stress in tea plant. *Journal of Nanjing Agricultural University*, 2022; 45(1):47–55.
63. Jiang T, Zhai H, Wang FB, Zhou HN, Si ZZ, He SZ, et al. Cloning and characterization of a salt tolerance-associated gene encoding trehalose-6-phosphate synthase in sweetpotato. *Journal of Integrative Agriculture*, 2014; 13(8):1651–1661.
64. Krishnamurthy P, Jyothi-Prakash PA, Qin L, He J, Lin QS, Loh CS, et al. Role of root hydrophobic barriers in salt exclusion of a mangrove plant *Avicennia officinalis*. *Plant Cell and Environment*, 2014; 37(7):1656–1671.
65. Vishal B, Krishnamurthy P, Ramamoorthy R, Kumar PP. *OsTPS8* controls yield-related traits and confers salt stress tolerance in rice by enhancing suberin deposition. *New Phytologist*, 2019; 221(3):1369–1386.
66. Chinnusamy V, Jagendorf A, Zhu JK. Understanding and improving salt tolerance in plants. *Crop Science*, 2005; 45(2):437–448.
67. Liu H, Hu HR, Tang KL, Rehman M, Du GH, Huang Y, et al. Overexpressing hemp salt stress induced transcription factor genes enhances tobacco salt tolerance. *Industrial Crops and Products*, 2022; 177:114497.
